# Supplementary material for: Limb Immobilization Induces a Coordinate Down-Regulation of Mitochondrial and Other Metabolic Pathways in Men and Women
Source: PLoS One. 2009 Aug 5;4(8):e6518. doi: 10.1371/journal.pone.0006518 (PMC2716517; doi:10.1371/journal.pone.0006518)
Supplement: Table S1 — Complete list of significantly altered genes from all analyses, organized by gene category. (1.05 MB XLS) [file pone.0006518.s006.xls]

## Sheet: Ox. Phos.
Oxidative Phosphorylation
Note: for atrophy analysis, the Ratio is defined as: Each 5 units of atrophy, expression changes by
Gene.Title	Gene.Symbol	Analysis	Ratio	rawp	UniGene.ID	TargetID
adenylate kinase 1	AK1	Atrophy	0.571106	5.39515e-05	Hs.175473	202588_at
ATP synthase mitochondrial F1 complex assembly factor 1	ATPAF1	Atrophy	0.735815	1.51762e-06	Hs.100874	224728_at
ubiquinol-cytochrome c reductase binding protein	UQCRB	Atrophy	0.731116	0.000140808	Hs.131255	209065_at
ATP synthase, H+ transporting, mitochondrial F0 complex, subunit C3 (subunit 9)	ATP5G3	Atrophy	0.823098	5.0817e-05	Hs.429	207507_s_at
ATP synthase, H+ transporting, mitochondrial F1 complex, delta subunit	ATP5D	Atrophy	0.771943	0.000102103	Hs.418668	213041_s_at
coenzyme Q10 homolog A (S. cerevisiae)	COQ10A	Atrophy	0.658078	1.09882e-05	Hs.4096	225747_at
coenzyme Q6 homolog, monooxygenase (S. cerevisiae)	COQ6	Atrophy	0.779732	1.53683e-05	Hs.632335	218760_at
cytochrome c-1	CYC1	Atrophy	0.801231	8.70785e-05	Hs.289271	201066_at
cytochrome c, somatic	CYCS	Atrophy	0.840979	5.41543e-06	Hs.437060	208905_at
NADH dehydrogenase (ubiquinone) Fe-S protein 1, 75kDa (NADH-coenzyme Q reductase)	NDUFS1	Atrophy	0.817052	8.47832e-05	Hs.471207	203039_s_at
NADH dehydrogenase (ubiquinone) Fe-S protein 8, 23kDa (NADH-coenzyme Q reductase)	NDUFS8	Atrophy	0.793691	9.63415e-05	Hs.90443	203190_at
ubiquinol-cytochrome c reductase core protein II	UQCRC2	Atrophy	0.869817	0.000180987	Hs.592048	212600_s_at
ATP synthase, H+ transporting, mitochondrial F0 complex, subunit C1 (subunit 9)	ATP5G1	48H	0.78741	2.36e-05	Hs.80986	208972_s_at
ATP synthase, H+ transporting, mitochondrial F0 complex, subunit G	ATP5L	48H	0.859463	0.000392764	Hs.486360	208746_x_at
ATP synthase, H+ transporting, mitochondrial F0 complex, subunit G	ATP5L	48H	0.86545	0.000390812	Hs.486360	210453_x_at
coenzyme Q10 homolog A (S. cerevisiae)	COQ10A	48H	0.682827	6.08e-09	Hs.4096	225747_at
coenzyme Q2 homolog, prenyltransferase (yeast)	COQ2	48H	0.829945	2.55e-05	Hs.144304	213379_at
coenzyme Q3 homolog, methyltransferase (S. cerevisiae)	COQ3	48H	0.760674	4.15e-06	Hs.653253	223515_s_at
cytochrome c oxidase subunit Va	COX5A	48H	0.735651	7.53e-05	Hs.401903	229426_at
cytochrome c oxidase subunit VIIa polypeptide 2 (liver)	COX7A2	48H	0.78789	3.62e-07	Hs.70312	201597_at
cytochrome c, somatic	CYCS	48H	0.866148	0.000162349	Hs.437060	208905_at
holocytochrome c synthase (cytochrome c heme-lyase)	HCCS	48H	0.78702	5.45e-09	Hs.211571	203745_at
ubiquinol-cytochrome c reductase complex (7.2 kD)	UCRC	48H	0.81097	4.57e-05	Hs.284292	228142_at
coenzyme Q3 homolog, methyltransferase (S. cerevisiae)	COQ3	48H	0.854912	0.000201297	Hs.653253	221227_x_at
ATP synthase, H+ transporting, mitochondrial F0 complex, subunit G	ATP5L	48H	0.801771	5.83e-05	Hs.486360	208745_at
ATP synthase, H+ transporting, mitochondrial F0 complex, subunit B1	ATP5F1	14D	0.822547	4.98093e-08	Hs.514870	211755_s_at
ATP synthase, H+ transporting, mitochondrial F0 complex, subunit C1 (subunit 9)	ATP5G1	14D	0.64835	9.9303e-09	Hs.80986	208972_s_at
ATP synthase, H+ transporting, mitochondrial F0 complex, subunit C2 (subunit 9)	ATP5G2	14D	0.882716	0.000821245	Hs.524464	208764_s_at
ATP synthase, H+ transporting, mitochondrial F0 complex, subunit C3 (subunit 9)	ATP5G3	14D	0.683264	0.000304584	Hs.429	228168_at
ATP synthase, H+ transporting, mitochondrial F0 complex, subunit C3 (subunit 9)	ATP5G3	14D	0.724895	1.30173e-08	Hs.429	207507_s_at
ATP synthase, H+ transporting, mitochondrial F0 complex, subunit C3 (subunit 9)	ATP5G3	14D	0.741936	9.36562e-07	Hs.429	207508_at
ATP synthase, H+ transporting, mitochondrial F0 complex, subunit d	ATP5H	14D	0.794577	4.60531e-08	Hs.514465	210149_s_at
ATP synthase, H+ transporting, mitochondrial F0 complex, subunit E	ATP5I	14D	0.793528	0.000105245	Hs.85539	209492_x_at
ATP synthase, H+ transporting, mitochondrial F0 complex, subunit F6	ATP5J	14D	0.783635	8.87358e-08	Hs.246310	202325_s_at
ATP synthase, H+ transporting, mitochondrial F0 complex, subunit G	ATP5L	14D	0.756897	1.85557e-06	Hs.486360	207573_x_at
ATP synthase, H+ transporting, mitochondrial F0 complex, subunit G	ATP5L	14D	0.75846	2.82906e-08	Hs.486360	208746_x_at
ATP synthase, H+ transporting, mitochondrial F0 complex, subunit G	ATP5L	14D	0.758748	8.28137e-08	Hs.486360	210453_x_at
ATP synthase, H+ transporting, mitochondrial F0 complex, subunit G	ATP5L	14D	0.77703	7.82136e-06	Hs.486360	208745_at
ATP synthase, H+ transporting, mitochondrial F1 complex, alpha subunit 1, cardiac muscle	ATP5A1	14D	0.860292	7.47497e-07	Hs.298280	213738_s_at
ATP synthase, H+ transporting, mitochondrial F1 complex, beta polypeptide	ATP5B	14D	0.808076	5.20716e-08	Hs.406510	201322_at
ATP synthase, H+ transporting, mitochondrial F1 complex, delta subunit	ATP5D	14D	0.593522	6.55119e-06	Hs.418668	203926_x_at
ATP synthase, H+ transporting, mitochondrial F1 complex, delta subunit	ATP5D	14D	0.701076	4.77964e-07	Hs.418668	213041_s_at
ATP synthase, H+ transporting, mitochondrial F1 complex, epsilon subunit	ATP5E	14D	0.849311	2.04276e-05	Hs.177530	217801_at
ATP synthase, H+ transporting, mitochondrial F1 complex, gamma polypeptide 1	ATP5C1	14D	0.831377	8.32161e-08	Hs.271135	205711_x_at
ATP synthase, H+ transporting, mitochondrial F1 complex, gamma polypeptide 1	ATP5C1	14D	0.834158	4.21012e-07	Hs.271135	213366_x_at
ATP synthase, H+ transporting, mitochondrial F1 complex, gamma polypeptide 1	ATP5C1	14D	0.841768	2.54978e-06	Hs.271135	208870_x_at
ATP synthase, H+ transporting, mitochondrial F1 complex, O subunit (oligomycin sensitivity conferring protein)	ATP5O	14D	0.75251	8.34333e-09	Hs.409140	200818_at
coenzyme Q10 homolog A (S. cerevisiae)	COQ10A	14D	0.522038	1.53864e-08	Hs.4096	225747_at
coenzyme Q2 homolog, prenyltransferase (yeast)	COQ2	14D	0.866044	0.00158766	Hs.144304	213379_at
coenzyme Q3 homolog, methyltransferase (S. cerevisiae)	COQ3	14D	0.759928	0.000115291	Hs.653253	223515_s_at
coenzyme Q3 homolog, methyltransferase (S. cerevisiae)	COQ3	14D	0.77344	3.35197e-07	Hs.653253	221227_x_at
coenzyme Q5 homolog, methyltransferase (S. cerevisiae)	COQ5	14D	0.826113	1.11586e-06	Hs.17250	223114_at
coenzyme Q6 homolog, monooxygenase (S. cerevisiae)	COQ6	14D	0.786283	2.68341e-05	Hs.632335	218760_at
coenzyme Q9 homolog (S. cerevisiae)	COQ9	14D	0.776514	5.94605e-09	Hs.513632	212228_s_at
COX10 homolog, cytochrome c oxidase assembly protein, heme A: farnesyltransferase (yeast)	COX10	14D	0.800923	4.84495e-06	Hs.462278	203858_s_at
COX11 homolog, cytochrome c oxidase assembly protein (yeast)	COX11	14D	0.860625	0.00119432	Hs.591171	211727_s_at
creatine kinase, mitochondrial 2 (sarcomeric)	CKMT2	14D	0.643241	1.20374e-10	Hs.80691	205295_at
cytochrome b-561	CYB561	14D	1.15724	0.00283908	Hs.355264	217200_x_at
cytochrome c oxidase subunit 8A (ubiquitous)	COX8A	14D	0.757512	1.94937e-08	Hs.433901	201119_s_at
cytochrome c oxidase subunit IV isoform 1	COX4I1	14D	0.48883	0.000631488	Hs.433419	213758_at
Cytochrome c oxidase subunit IV isoform 1	COX4I1	14D	0.746399	1.30751e-08	Hs.433419	200086_s_at
cytochrome c oxidase subunit IV isoform 1	COX4I1	14D	0.753902	1.00916e-09	Hs.433419	202698_x_at
cytochrome c oxidase subunit Va	COX5A	14D	0.736179	0.000208432	Hs.401903	229426_at
cytochrome c oxidase subunit Va	COX5A	14D	0.784641	2.82765e-08	Hs.401903	203663_s_at
cytochrome c oxidase subunit Vb	COX5B	14D	0.719203	7.83491e-10	Hs.1342	213735_s_at
cytochrome c oxidase subunit Vb	COX5B	14D	0.727228	2.44953e-11	Hs.1342	211025_x_at
cytochrome c oxidase subunit Vb	COX5B	14D	0.73355	2.46189e-10	Hs.1342	202343_x_at
Cytochrome c oxidase subunit Vb	COX5B	14D	0.756491	0.00205551	Hs.1342	213736_at
cytochrome c oxidase subunit VIa polypeptide 2	COX6A2	14D	0.669411	2.88262e-06	Hs.250760	206353_at
cytochrome c oxidase subunit Vib polypeptide 1 (ubiquitous)	COX6B1	14D	0.737944	1.39879e-08	Hs.431668	201441_at
cytochrome c oxidase subunit VIc	COX6C	14D	0.826552	1.79113e-07	Hs.351875	201754_at
cytochrome c oxidase subunit VIIa polypeptide 1 (muscle)	COX7A1	14D	0.725116	4.08756e-07	Hs.421621	204570_at
cytochrome c oxidase subunit VIIa polypeptide 2 (liver)	COX7A2	14D	0.701831	2.28938e-10	Hs.70312	201597_at
cytochrome c oxidase subunit VIIa polypeptide 2 like	COX7A2L	14D	0.901695	0.000429379	Hs.339639	201256_at
cytochrome c oxidase subunit VIIb	COX7B	14D	0.766038	1.59576e-07	Hs.522699	202110_at
cytochrome c oxidase subunit VIIc	COX7C	14D	0.790588	5.87969e-08	Hs.430075	213846_at
cytochrome c oxidase subunit VIIc	COX7C	14D	0.795013	6.32163e-07	Hs.430075	201134_x_at
cytochrome c oxidase subunit VIIc	COX7C	14D	0.823772	3.69318e-08	Hs.430075	217491_x_at
cytochrome c-1	CYC1	14D	0.699763	2.97328e-08	Hs.289271	201066_at
cytochrome c, somatic	CYCS	14D	0.748938	2.91339e-09	Hs.437060	208905_at
cytochrome c, somatic	CYCS	14D	0.811279	0.000133344	Hs.437060	229415_at
electron-transfer-flavoprotein, alpha polypeptide (glutaric aciduria II)	ETFA	14D	0.864416	1.44093e-05	Hs.39925	201931_at
electron-transfer-flavoprotein, beta polypeptide	ETFB	14D	0.767038	5.30896e-06	Hs.654553	202942_at
electron-transferring-flavoprotein dehydrogenase	ETFDH	14D	0.773629	2.67841e-06	Hs.155729	33494_at
electron-transferring-flavoprotein dehydrogenase	ETFDH	14D	0.788235	7.95164e-07	Hs.155729	205530_at
family with sequence similarity 120A	FAM120A	14D	0.883102	0.00117559	Hs.372003	200767_s_at
ferredoxin 1	FDX1	14D	0.823297	0.00097996	Hs.744	239161_at
ferredoxin 1	FDX1	14D	0.853725	0.000107904	Hs.744	203647_s_at
holocytochrome c synthase (cytochrome c heme-lyase)	HCCS	14D	0.783672	1.23576e-06	Hs.211571	203745_at
holocytochrome c synthase (cytochrome c heme-lyase)	HCCS	14D	0.794867	1.4173e-06	Hs.211571	203746_s_at
iron-sulfur cluster assembly 1 homolog (S. cerevisiae)	ISCA1	14D	0.789182	0.000180257	Hs.449291	209273_s_at
iron-sulfur cluster assembly 1 homolog (S. cerevisiae)	ISCA1	14D	0.804301	0.00027811	Hs.449291	209274_s_at
iron-sulfur cluster assembly 1 homolog (S. cerevisiae)	ISCA1	14D	0.807206	0.000894157	Hs.449291	221425_s_at
mitochondrial intermediate peptidase	MIPEP	14D	0.841473	0.000156861	Hs.507498	204305_at
NAD(P)H dehydrogenase, quinone 1	NQO1	14D	1.41361	0.000785071	Hs.406515	210519_s_at
NAD(P)H dehydrogenase, quinone 2	NQO2	14D	0.863177	0.000155263	Hs.533050	203814_s_at
NADH dehydrogenase (ubiquinone) 1 alpha subcomplex, 1, 7.5kDa	NDUFA1	14D	0.756166	9.7132e-08	Hs.534168	202298_at
NADH dehydrogenase (ubiquinone) 1 alpha subcomplex, 10, 42kDa /// similar to NADH dehydrogenase (ubiquinone) 1 alpha subcomplex, 10, 42kDa precursor	LOC732160 /// NDUFA10	14D	0.77506	2.72017e-07	Hs.277677	217860_at
NADH dehydrogenase (ubiquinone) 1 alpha subcomplex, 11, 14.7kDa	NDUFA11	14D	0.884175	0.00166676	Hs.406062	228690_s_at
NADH dehydrogenase (ubiquinone) 1 alpha subcomplex, 11, 14.7kDa	NDUFA11	14D	0.902009	0.00103894	Hs.406062	225304_s_at
NADH dehydrogenase (ubiquinone) 1 alpha subcomplex, 12	NDUFA12	14D	0.84349	2.6401e-07	Hs.506374	223244_s_at
NADH dehydrogenase (ubiquinone) 1 alpha subcomplex, 13	NDUFA13	14D	0.79485	2.50993e-07	Hs.534453	220864_s_at
NADH dehydrogenase (ubiquinone) 1 alpha subcomplex, 2, 8kDa	NDUFA2	14D	0.863696	0.000207116	Hs.534333	209224_s_at
NADH dehydrogenase (ubiquinone) 1 alpha subcomplex, 3, 9kDa	NDUFA3	14D	0.799173	9.39594e-06	Hs.198269	218563_at
NADH dehydrogenase (ubiquinone) 1 alpha subcomplex, 4, 9kDa	NDUFA4	14D	0.837972	4.82357e-07	Hs.50098	217773_s_at
NADH dehydrogenase (ubiquinone) 1 alpha subcomplex, 6, 14kDa	NDUFA6	14D	0.76433	2.66599e-07	Hs.274416	202001_s_at
NADH dehydrogenase (ubiquinone) 1 alpha subcomplex, 7, 14.5kDa	NDUFA7	14D	0.874687	0.000956742	Hs.333427	202785_at
NADH dehydrogenase (ubiquinone) 1 alpha subcomplex, 8, 19kDa	NDUFA8	14D	0.763685	1.25528e-06	Hs.495039	218160_at
NADH dehydrogenase (ubiquinone) 1 alpha subcomplex, 9, 39kDa	NDUFA9	14D	0.766956	2.99115e-07	Hs.75227	208969_at
NADH dehydrogenase (ubiquinone) 1 beta subcomplex, 1, 7kDa	NDUFB1	14D	0.878531	3.52419e-05	Hs.183435	206790_s_at
NADH dehydrogenase (ubiquinone) 1 beta subcomplex, 10, 22kDa	NDUFB10	14D	0.694245	1.83459e-06	Hs.513266	228301_x_at
NADH dehydrogenase (ubiquinone) 1 beta subcomplex, 10, 22kDa	NDUFB10	14D	0.698217	1.5321e-08	Hs.513266	223112_s_at
NADH dehydrogenase (ubiquinone) 1 beta subcomplex, 11, 17.3kDa	NDUFB11	14D	0.745322	2.79453e-06	Hs.521969	218320_s_at
NADH dehydrogenase (ubiquinone) 1 beta subcomplex, 2, 8kDa	NDUFB2	14D	0.887011	7.53918e-06	Hs.655788	218200_s_at
NADH dehydrogenase (ubiquinone) 1 beta subcomplex, 2, 8kDa	NDUFB2	14D	0.890807	0.000611453	Hs.655788	218201_at
NADH dehydrogenase (ubiquinone) 1 beta subcomplex, 3, 12kDa	NDUFB3	14D	0.806995	5.06918e-05	Hs.109760	203371_s_at
NADH dehydrogenase (ubiquinone) 1 beta subcomplex, 4, 15kDa /// similar to NADH dehydrogenase (ubiquinone) 1 beta subcomplex, 4, 15kDa	LOC727762 /// NDUFB4	14D	0.861917	4.39939e-06	Hs.304613	218226_s_at
NADH dehydrogenase (ubiquinone) 1 beta subcomplex, 5, 16kDa	NDUFB5	14D	0.788062	1.06003e-06	Hs.518424	203621_at
NADH dehydrogenase (ubiquinone) 1 beta subcomplex, 6, 17kDa	NDUFB6	14D	0.807442	8.06639e-07	Hs.493668	203613_s_at
NADH dehydrogenase (ubiquinone) 1 beta subcomplex, 7, 18kDa	NDUFB7	14D	0.843353	0.00237903	Hs.532853	202839_s_at
NADH dehydrogenase (ubiquinone) 1 beta subcomplex, 8, 19kDa	NDUFB8	14D	0.730167	5.44149e-05	Hs.523215	214241_at
NADH dehydrogenase (ubiquinone) 1 beta subcomplex, 8, 19kDa	NDUFB8	14D	0.796062	9.78631e-07	Hs.523215	201226_at
NADH dehydrogenase (ubiquinone) 1 beta subcomplex, 8, 19kDa	NDUFB8	14D	0.798668	5.42325e-06	Hs.523215	201227_s_at
NADH dehydrogenase (ubiquinone) 1 beta subcomplex, 9, 22kDa	NDUFB9	14D	0.883194	1.035e-06	Hs.15977	222992_s_at
NADH dehydrogenase (ubiquinone) 1, alpha/beta subcomplex, 1, 8kDa	NDUFAB1	14D	0.771585	9.46923e-08	Hs.189716	202077_at
NADH dehydrogenase (ubiquinone) 1, subcomplex unknown, 1, 6kDa	NDUFC1	14D	0.858224	6.58714e-05	Hs.84549	203478_at
NADH dehydrogenase (ubiquinone) 1, subcomplex unknown, 2, 14.5kDa	NDUFC2	14D	0.904987	8.13073e-05	Hs.407860	218101_s_at
NADH dehydrogenase (ubiquinone) Fe-S protein 1, 75kDa (NADH-coenzyme Q reductase)	NDUFS1	14D	0.774811	1.52513e-06	Hs.471207	203039_s_at
NADH dehydrogenase (ubiquinone) Fe-S protein 2, 49kDa (NADH-coenzyme Q reductase)	NDUFS2	14D	0.846979	2.30662e-05	Hs.173611	201966_at
NADH dehydrogenase (ubiquinone) Fe-S protein 3, 30kDa (NADH-coenzyme Q reductase)	NDUFS3	14D	0.703295	3.3389e-10	Hs.502528	201740_at
NADH dehydrogenase (ubiquinone) Fe-S protein 4, 18kDa (NADH-coenzyme Q reductase)	NDUFS4	14D	0.771178	3.45402e-09	Hs.528222	209303_at
NADH dehydrogenase (ubiquinone) Fe-S protein 6, 13kDa (NADH-coenzyme Q reductase)	NDUFS6	14D	0.77742	1.68061e-06	Hs.408257	203606_at
NADH dehydrogenase (ubiquinone) Fe-S protein 7, 20kDa (NADH-coenzyme Q reductase)	NDUFS7	14D	0.765088	6.92304e-05	Hs.211914	211752_s_at
NADH dehydrogenase (ubiquinone) Fe-S protein 8, 23kDa (NADH-coenzyme Q reductase)	NDUFS8	14D	0.689886	3.35698e-08	Hs.90443	203190_at
NADH dehydrogenase (ubiquinone) Fe-S protein 8, 23kDa (NADH-coenzyme Q reductase)	NDUFS8	14D	0.721692	7.95246e-08	Hs.90443	203189_s_at
NADH dehydrogenase (ubiquinone) flavoprotein 1, 51kDa	NDUFV1	14D	0.772456	3.67085e-07	Hs.7744	208714_at
NADH dehydrogenase (ubiquinone) flavoprotein 2, 24kDa	NDUFV2	14D	0.807073	6.7638e-09	Hs.464572	202941_at
NADH dehydrogenase (ubiquinone) flavoprotein 3, 10kDa	NDUFV3	14D	0.804487	9.45098e-06	Hs.473937	226616_s_at
oxidase (cytochrome c) assembly 1-like	OXA1L	14D	0.767354	1.85428e-08	Hs.151134	208717_at
oxidoreductase NAD-binding domain containing 1	OXNAD1	14D	0.680761	1.15856e-06	Hs.655449	227686_at
prenyl (decaprenyl) diphosphate synthase, subunit 1	PDSS1	14D	0.796816	1.62683e-05	Hs.558468	220865_s_at
succinate dehydrogenase complex, subunit A, flavoprotein (Fp)	SDHA	14D	0.88511	0.000785593	Hs.440475	201093_x_at
succinate dehydrogenase complex, subunit A, flavoprotein pseudogene 1	SDHALP1	14D	0.884452	0.000381664	---	222021_x_at
succinate dehydrogenase complex, subunit B, iron sulfur (Ip)	SDHB	14D	0.734553	8.63309e-11	Hs.465924	202675_at
succinate dehydrogenase complex, subunit C, integral membrane protein, 15kDa	SDHC	14D	0.827613	0.000235234	Hs.444472	210131_x_at
succinate dehydrogenase complex, subunit D, integral membrane protein	SDHD	14D	0.877538	0.00104595	Hs.356270	202026_at
ubiquinol-cytochrome c reductase binding protein	UQCRB	14D	0.744424	0.000103114	Hs.131255	209065_at
ubiquinol-cytochrome c reductase binding protein	UQCRB	14D	0.793071	3.47126e-07	Hs.131255	209066_x_at
ubiquinol-cytochrome c reductase binding protein	UQCRB	14D	0.797238	7.5064e-06	Hs.131255	205849_s_at
ubiquinol-cytochrome c reductase complex (7.2 kD)	UCRC	14D	0.74237	1.37112e-07	Hs.284292	218190_s_at
ubiquinol-cytochrome c reductase complex (7.2 kD)	UCRC	14D	0.837197	0.00111483	Hs.284292	228142_at
ubiquinol-cytochrome c reductase core protein I	UQCRC1	14D	0.778956	5.21929e-09	Hs.119251	201903_at
ubiquinol-cytochrome c reductase core protein II	UQCRC2	14D	0.811927	2.4921e-05	Hs.592048	200883_at
ubiquinol-cytochrome c reductase core protein II	UQCRC2	14D	0.824357	6.20387e-07	Hs.592048	212600_s_at
ubiquinol-cytochrome c reductase hinge protein	UQCRH	14D	0.727791	4.88031e-08	Hs.481571	202233_s_at
ubiquinol-cytochrome c reductase, 6.4kDa subunit /// transmembrane protein 54	TMEM54 /// UQCR	14D	0.833462	4.63705e-06	Hs.534521	202090_s_at
ubiquinol-cytochrome c reductase, Rieske iron-sulfur polypeptide 1	UQCRFS1	14D	0.816951	3.29839e-07	Hs.170107	208909_at

## Sheet: TCA
Citric Acid Cycle
Note: for atrophy analysis, the Ratio is defined as: Each 5 units of atrophy, expression changes by
Gene.Title	Gene.Symbol	Analysis	Ratio	rawp	UniGene.ID	TargetID
succinate-CoA ligase, ADP-forming, beta subunit	SUCLA2	Atrophy	0.836717	0.000152286	Hs.546323	202930_s_at
citrate synthase	CS	Atrophy	0.883104	0.000203616	Hs.430606	208660_at
dihydrolipoamide S-acetyltransferase (E2 component of pyruvate dehydrogenase complex)	DLAT	Atrophy	0.764056	3.1047e-06	Hs.335551	212568_s_at
malate dehydrogenase 1, NAD (soluble)	MDH1	Atrophy	0.782618	6.76941e-06	Hs.526521	200978_at
glycerol-3-phosphate dehydrogenase 2 (mitochondrial)	GPD2	48H	1.54193	0.000135524	Hs.512382	225447_at
dihydrolipoamide S-acetyltransferase (E2 component of pyruvate dehydrogenase complex)	DLAT	48H	0.815114	4.86e-05	Hs.335551	212568_s_at
isocitrate dehydrogenase 1 (NADP+), soluble	IDH1	48H	0.831415	0.00045847	Hs.654624	201193_at
malate dehydrogenase 1, NAD (soluble)	MDH1	48H	0.835938	0.00015738	Hs.526521	200978_at
isocitrate dehydrogenase 1 (NADP+), soluble	IDH1	48H	0.814809	0.000132276	Hs.654624	1555037_a_at
oxidoreductase NAD-binding domain containing 1	OXNAD1	48H	0.779591	2.26e-06	Hs.655449	227686_at
dehydrogenase/reductase (SDR family) member 7B	DHRS7B	48H	0.802627	0.000280324	Hs.386989	220690_s_at
isocitrate dehydrogenase 2 (NADP+), mitochondrial	IDH2	48H	0.76972	9.82e-05	Hs.596461	210045_at
acetyl-Coenzyme A acetyltransferase 1 (acetoacetyl Coenzyme A thiolase)	ACAT1	14D	0.697504	1.87577e-07	Hs.232375	205412_at
aconitase 2, mitochondrial	ACO2	14D	0.780529	1.00698e-06	Hs.654717	200793_s_at
citrate synthase	CS	14D	0.841686	6.66186e-07	Hs.430606	208660_at
dihydrolipoamide S-acetyltransferase (E2 component of pyruvate dehydrogenase complex)	DLAT	14D	0.768914	1.28137e-05	Hs.335551	212568_s_at
dihydrolipoamide S-acetyltransferase (E2 component of pyruvate dehydrogenase complex)	DLAT	14D	0.80008	0.00051305	Hs.335551	213149_at
dihydrolipoamide S-acetyltransferase (E2 component of pyruvate dehydrogenase complex)	DLAT	14D	0.803315	0.000257767	Hs.335551	211150_s_at
dihydrolipoamide S-succinyltransferase (E2 component of 2-oxo-glutarate complex) /// dihydrolipoamide S-succinyltransferase pseudogene (E2 component of 2-oxo-glutarate complex)	DLST /// DLSTP	14D	0.835788	0.00163889	Hs.525459	215210_s_at
family with sequence similarity 118, member B	FAM118B	14D	1.13453	0.000577655	Hs.276315	223386_at
fumarate hydratase	FH	14D	0.800046	5.32533e-06	Hs.592490	214170_x_at
glycerol-3-phosphate dehydrogenase 2 (mitochondrial)	GPD2	14D	1.54022	7.39784e-07	Hs.512382	210007_s_at
glycerol-3-phosphate dehydrogenase 2 (mitochondrial)	GPD2	14D	1.91749	4.15801e-10	Hs.512382	225447_at
isocitrate dehydrogenase 1 (NADP+), soluble	IDH1	14D	0.8515	0.000982617	Hs.654624	201193_at
isocitrate dehydrogenase 2 (NADP+), mitochondrial	IDH2	14D	0.723626	5.86619e-05	Hs.596461	210045_at
isocitrate dehydrogenase 2 (NADP+), mitochondrial	IDH2	14D	0.772743	1.15702e-05	Hs.596461	210046_s_at
isocitrate dehydrogenase 3 (NAD+) alpha	IDH3A	14D	0.861403	0.00190603	Hs.591110	202070_s_at
isocitrate dehydrogenase 3 (NAD+) alpha	IDH3A	14D	0.864725	0.00280856	Hs.591110	202069_s_at
isocitrate dehydrogenase 3 (NAD+) beta	IDH3B	14D	0.709327	7.02707e-06	Hs.436405	210418_s_at
isocitrate dehydrogenase 3 (NAD+) beta	IDH3B	14D	0.75691	2.48397e-06	Hs.436405	210014_x_at
malate dehydrogenase 1, NAD (soluble)	MDH1	14D	0.691838	2.13973e-08	Hs.526521	200978_at
Malate dehydrogenase 1, NAD (soluble)	MDH1	14D	0.723713	0.00128925	Hs.526521	235374_at
malate dehydrogenase 2, NAD (mitochondrial)	MDH2	14D	0.715821	7.11723e-07	Hs.520967	213333_at
malate dehydrogenase 2, NAD (mitochondrial)	MDH2	14D	0.780733	2.86938e-07	Hs.520967	209036_s_at
similar to aconitase 2, mitochondrial	LOC646677 /// LOC650674	14D	0.765991	0.000135055	---	217337_at
succinate-CoA ligase, ADP-forming, beta subunit	SUCLA2	14D	0.803765	3.47539e-06	Hs.546323	202930_s_at
succinate-CoA ligase, GDP-forming, alpha subunit	SUCLG1	14D	0.722303	5.66223e-08	Hs.270428	217874_at

## Sheet: Mito. Reg.
Mitochondrial Regulatory Factors
Note: for atrophy analysis, the Ratio is defined as: Each 5 units of atrophy, expression changes by
Gene.Title	Gene.Symbol	Analysis	Ratio	rawp	UniGene.ID	TargetID
coiled-coil-helix-coiled-coil-helix domain containing 3	CHCHD3	Atrophy	0.760483	4.93863e-05	Hs.655010	217972_at
coiled-coil-helix-coiled-coil-helix domain containing 4	CHCHD4	Atrophy	0.742626	4.69232e-05	Hs.517815	229595_at
glutamic-oxaloacetic transaminase 2, mitochondrial (aspartate aminotransferase 2)	GOT2	Atrophy	0.724102	3.4233e-06	Hs.599470	200708_at
mitochondrial ribosomal protein L15	MRPL15	Atrophy	0.852711	0.000196113	Hs.18349	218027_at
mitochondrial ribosomal protein L33	MRPL33	Atrophy	0.797635	0.000156263	Hs.515879	203781_at
B-cell CLL/lymphoma 2	BCL2	48H	1.29724	8.64e-07	Hs.150749	203685_at
IMP1 inner mitochondrial membrane peptidase-like (S. cerevisiae)	IMMP1L	48H	0.8021	7.57e-05	Hs.502223	229025_s_at
mitochondrial protein 18 kDa	MTP18	48H	0.468642	5.99e-05	Hs.656909	223172_s_at
mitochondrial ribosomal protein L15	MRPL15	48H	0.847034	2.45e-09	Hs.18349	218027_at
mitochondrial ribosomal protein L34	MRPL34	48H	0.800294	0.000471533	Hs.515242	221692_s_at
mitochondrial ribosomal protein L35	MRPL35	48H	0.828929	0.000106531	Hs.433439	222775_s_at
mitochondrial ribosomal protein L47	MRPL47	48H	0.825767	9.89e-06	Hs.283734	223480_s_at
mitochondrial ribosomal protein S12	MRPS12	48H	0.788083	0.000220074	Hs.411125	204331_s_at
mitochondrial ribosomal protein S35	MRPS35	48H	0.8736	7.38e-05	Hs.311072	217942_at
reticulon 4 interacting protein 1	RTN4IP1	48H	0.678491	6.15e-05	Hs.155839	224509_s_at
A kinase (PRKA) anchor protein 1	AKAP1	48H	0.762286	0.000113536	Hs.463506	210625_s_at
A kinase (PRKA) anchor protein 1	AKAP1	48H	0.752608	6.6e-06	Hs.463506	201674_s_at
A kinase (PRKA) anchor protein 1	AKAP1	48H	0.783674	2.94e-05	Hs.463506	201675_at
PAP associated domain containing 1	PAPD1	48H	0.833393	0.000134096	Hs.173946	218947_s_at
2,4-dienoyl CoA reductase 1, mitochondrial	DECR1	14D	0.774847	3.69487e-06	Hs.492212	202447_at
A kinase (PRKA) anchor protein 1	AKAP1	14D	0.694468	1.75111e-07	Hs.463506	201674_s_at
A kinase (PRKA) anchor protein 1	AKAP1	14D	0.695881	5.76718e-07	Hs.463506	201675_at
A kinase (PRKA) anchor protein 1	AKAP1	14D	0.708474	5.9215e-06	Hs.463506	210625_s_at
AFG3 ATPase family gene 3-like 2 (yeast)	AFG3L2	14D	0.814957	0.000204346	Hs.528996	202486_at
AFG3 ATPase family gene 3-like 2 (yeast)	AFG3L2	14D	0.828672	1.37856e-05	Hs.528996	1557820_at
AU RNA binding protein/enoyl-Coenzyme A hydratase	AUH	14D	0.80035	6.33299e-06	Hs.175905	205052_at
ClpP caseinolytic peptidase, ATP-dependent, proteolytic subunit homolog (E. coli)	CLPP	14D	0.860288	0.000145901	Hs.515092	202799_at
coiled-coil domain containing 44	CCDC44	14D	0.753838	3.71827e-05	Hs.174134	221069_s_at
coiled-coil-helix-coiled-coil-helix domain containing 3	CHCHD3	14D	0.683832	2.47526e-07	Hs.655010	217972_at
coiled-coil-helix-coiled-coil-helix domain containing 4	CHCHD4	14D	0.750088	4.3905e-05	Hs.517815	229595_at
dihydrolipoamide dehydrogenase	DLD	14D	0.848205	0.000984044	Hs.131711	209095_at
DnaJ (Hsp40) homolog, subfamily C, member 19	DNAJC19	14D	0.862198	7.71695e-06	Hs.230601	225359_at
DnaJ (Hsp40) homolog, subfamily C, member 19	DNAJC19	14D	0.884995	2.05656e-06	Hs.230601	225358_at
endonuclease G	ENDOG	14D	0.654488	1.22396e-07	Hs.591905	204824_at
endonuclease G-like 1	ENDOGL1	14D	1.64333	0.000198071	Hs.517897	205521_at
G elongation factor, mitochondrial 2	GFM2	14D	0.8721	2.70998e-05	Hs.277154	225392_at
glutamic-oxaloacetic transaminase 2, mitochondrial (aspartate aminotransferase 2)	GOT2	14D	0.631288	3.92034e-08	Hs.599470	200708_at
GrpE-like 1, mitochondrial (E. coli)	GRPEL1	14D	0.829599	2.8113e-07	Hs.443723	212434_at
inner membrane protein, mitochondrial (mitofilin)	IMMT	14D	0.806911	8.44024e-08	Hs.148559	200955_at
leucine-rich PPR-motif containing	LRPPRC	14D	0.806092	9.83554e-06	Hs.368084	211615_s_at
leucine-rich PPR-motif containing	LRPPRC	14D	0.899627	0.00248291	Hs.368084	211971_s_at
mitochondria-associated protein involved in granulocyte-macrophage colony-stimulating factor signal transduction	Magmas	14D	0.839433	0.000241825	Hs.644614	218969_at
mitochondrial protein 18 kDa	MTP18	14D	0.283932	1.47186e-06	Hs.656909	223172_s_at
mitochondrial ribosomal protein L1	MRPL1	14D	0.815366	3.20313e-05	Hs.532019	223154_at
mitochondrial ribosomal protein L11	MRPL11	14D	0.822551	0.000102115	Hs.418450	219162_s_at
mitochondrial ribosomal protein L12	MRPL12	14D	0.641121	5.05706e-07	Hs.109059	203931_s_at
mitochondrial ribosomal protein L13	MRPL13	14D	0.815377	0.000252627	Hs.333823	218049_s_at
mitochondrial ribosomal protein L15	MRPL15	14D	0.765349	2.75266e-08	Hs.18349	218027_at
mitochondrial ribosomal protein L16	MRPL16	14D	0.881241	0.00231132	Hs.530734	217980_s_at
mitochondrial ribosomal protein L18	MRPL18	14D	0.838712	6.27777e-05	Hs.416998	217907_at
mitochondrial ribosomal protein L2	MRPL2	14D	0.792655	0.000420855	Hs.55041	218887_at
mitochondrial ribosomal protein L2	MRPL2	14D	0.883445	0.000655048	Hs.55041	229884_s_at
mitochondrial ribosomal protein L21	MRPL21	14D	0.815642	2.71297e-06	Hs.503047	225315_at
mitochondrial ribosomal protein L23	MRPL23	14D	0.910427	0.00183619	Hs.3254	213897_s_at
mitochondrial ribosomal protein L27	MRPL27	14D	0.850526	2.558e-05	Hs.7736	224330_s_at
mitochondrial ribosomal protein L33	MRPL33	14D	0.754805	2.83593e-06	Hs.515879	203781_at
mitochondrial ribosomal protein L34	MRPL34	14D	0.674645	1.17734e-07	Hs.515242	221692_s_at
mitochondrial ribosomal protein L35	MRPL35	14D	0.773037	2.8753e-06	Hs.433439	222775_s_at
mitochondrial ribosomal protein L35	MRPL35	14D	0.778244	0.00130779	Hs.433439	218890_x_at
mitochondrial ribosomal protein L36	MRPL36	14D	0.851592	2.53367e-05	Hs.32196	224331_s_at
mitochondrial ribosomal protein L37	MRPL37	14D	0.856682	9.80346e-06	Hs.584908	222993_at
mitochondrial ribosomal protein L4	MRPL4	14D	0.763583	9.12512e-07	Hs.279652	223743_s_at
mitochondrial ribosomal protein L4	MRPL4	14D	0.776296	9.4633e-07	Hs.279652	218105_s_at
Mitochondrial ribosomal protein L41	MRPL41	14D	0.506643	0.000118621	Hs.44017	225423_x_at
mitochondrial ribosomal protein L41	MRPL41	14D	0.636559	7.21494e-11	Hs.44017	227186_s_at
Mitochondrial ribosomal protein L41	MRPL41	14D	0.691992	0.00012807	Hs.44017	230034_x_at
mitochondrial ribosomal protein L41	MRPL41	14D	0.703879	7.35337e-09	Hs.44017	225425_s_at
mitochondrial ribosomal protein L47	MRPL47	14D	0.832772	8.5163e-07	Hs.283734	223480_s_at
mitochondrial ribosomal protein L48	MRPL48	14D	0.867365	0.00178239	Hs.503239	218281_at
mitochondrial ribosomal protein L49	MRPL49	14D	1.15513	0.000577309	Hs.75859	201717_at
mitochondrial ribosomal protein L51	MRPL51	14D	0.873942	0.000599397	Hs.55847	223086_x_at
mitochondrial ribosomal protein S12	MRPS12	14D	0.491094	0.00212348	Hs.411125	210008_s_at
mitochondrial ribosomal protein S12	MRPS12	14D	0.685145	2.97461e-08	Hs.411125	204331_s_at
mitochondrial ribosomal protein S15	MRPS15	14D	0.80844	4.2992e-05	Hs.352839	226296_s_at
mitochondrial ribosomal protein S15	MRPS15	14D	0.815987	0.00082417	Hs.352839	223292_s_at
mitochondrial ribosomal protein S15	MRPS15	14D	0.84538	0.000647352	Hs.352839	221437_s_at
mitochondrial ribosomal protein S17	MRPS17	14D	0.849818	9.32447e-06	Hs.44298	218982_s_at
mitochondrial ribosomal protein S18A	MRPS18A	14D	0.89329	0.000213659	Hs.520149	221693_s_at
mitochondrial ribosomal protein S18B	MRPS18B	14D	0.750797	3.19469e-06	Hs.655329	217408_at
mitochondrial ribosomal protein S18B	MRPS18B	14D	0.813839	0.000176045	Hs.655329	208907_s_at
mitochondrial ribosomal protein S22	MRPS22	14D	0.877877	2.77258e-05	Hs.581614	219220_x_at
mitochondrial ribosomal protein S22	MRPS22	14D	0.887425	0.000273564	Hs.581614	226257_x_at
mitochondrial ribosomal protein S22	MRPS22	14D	0.895297	0.000970732	Hs.581614	223448_x_at
mitochondrial ribosomal protein S24	MRPS24	14D	0.807618	5.3107e-08	---	224948_at
mitochondrial ribosomal protein S25	MRPS25	14D	0.822154	1.19025e-05	Hs.555973	224869_s_at
mitochondrial ribosomal protein S27	MRPS27	14D	0.863401	0.0005374	Hs.482491	212145_at
mitochondrial ribosomal protein S28	MRPS28	14D	0.863134	2.40112e-05	Hs.521124	219819_s_at
mitochondrial ribosomal protein S30	MRPS30	14D	0.820549	1.33659e-05	Hs.591747	218398_at
mitochondrial ribosomal protein S33	MRPS33	14D	0.795029	4.89916e-09	Hs.416207	218654_s_at
mitochondrial ribosomal protein S35	MRPS35	14D	0.854631	2.63876e-05	Hs.311072	217942_at
mitochondrial ribosomal protein S36	MRPS36	14D	0.795357	1.03513e-06	Hs.631971	224302_s_at
mitochondrial ribosomal protein S6	MRPS6	14D	1.16177	0.000208267	Hs.655054	224919_at
mitochondrial ribosomal protein S7	MRPS7	14D	0.855374	2.80988e-06	Hs.71787	217932_at
mitochondrial ribosomal protein S9	MRPS9	14D	0.802174	2.08798e-05	Hs.590900	226749_at
mitochondrial translational initiation factor 2	MTIF2	14D	0.79327	1.36827e-06	Hs.149894	203095_at
mitofusin 2	MFN2	14D	0.780724	3.01106e-07	Hs.376681	201155_s_at
MTERF domain containing 3	MTERFD3	14D	1.26104	7.19349e-06	Hs.5009	225346_at
MTERF domain containing 3	MTERFD3	14D	1.28933	2.57646e-05	Hs.5009	225341_at
optic atrophy 1 (autosomal dominant)	OPA1	14D	0.911208	0.00125498	Hs.594504	212213_x_at
peptidylprolyl isomerase F (cyclophilin F)	PPIF	14D	0.650801	3.48801e-08	Hs.381072	201489_at
peptidylprolyl isomerase F (cyclophilin F)	PPIF	14D	0.715524	1.26613e-06	Hs.381072	201490_s_at
protein phosphatase 1, catalytic subunit, gamma isoform	PPP1CC	14D	0.871124	0.000357588	Hs.79081	200726_at
reticulon 4 interacting protein 1	RTN4IP1	14D	0.631156	8.25127e-05	Hs.155839	224509_s_at
reticulon 4 interacting protein 1	RTN4IP1	14D	0.767825	0.000476577	Hs.155839	1555679_a_at
sorting and assembly machinery component 50 homolog (S. cerevisiae)	SAMM50	14D	0.890276	0.00160366	Hs.505824	201570_at
suppressor of var1, 3-like 1 (S. cerevisiae)	SUPV3L1	14D	0.813944	4.28688e-06	Hs.106469	212894_at
tryptophanyl tRNA synthetase 2, mitochondrial	WARS2	14D	0.595801	0.00082066	Hs.523506	218766_s_at
Ts translation elongation factor, mitochondrial	TSFM	14D	0.787289	0.00210819	Hs.632704	214331_at
Ts translation elongation factor, mitochondrial	TSFM	14D	0.830235	0.000815944	Hs.632704	214332_s_at
zinc finger, CDGSH-type domain 1	ZCD1	14D	0.835962	7.193e-07	Hs.370102	218597_s_at

## Sheet: Mt. FA. Metab.
Mitochondrial Fatty Acid Metabolism
Note: for atrophy analysis, the Ratio is defined as: Each 5 units of atrophy, expression changes by
Gene.Title	Gene.Symbol	Analysis	Ratio	rawp	UniGene.ID	TargetID
acyl-Coenzyme A dehydrogenase, C-4 to C-12 straight chain	ACADM	Atrophy	0.749779	3.26304e-05	Hs.445040	202502_at
3-hydroxybutyrate dehydrogenase, type 1	BDH1	14D	0.623678	5.85423e-06	Hs.274539	211715_s_at
acetyl-Coenzyme A carboxylase beta	ACACB	14D	0.873698	0.000956377	Hs.234898	49452_at
acyl-CoA synthetase long-chain family member 1	ACSL1	14D	0.743555	4.44989e-06	Hs.406678	201963_at
acyl-CoA synthetase long-chain family member 1	ACSL1	14D	0.757094	5.76938e-05	Hs.406678	207275_s_at
acyl-CoA synthetase short-chain family member 1	ACSS1	14D	0.714602	0.0011939	Hs.529353	224882_at
acyl-CoA thioesterase 2 /// acyl-CoA thioesterase 1	ACOT1 /// ACOT2	14D	0.790635	1.28863e-06	Hs.446685	202982_s_at
acyl-Coenzyme A dehydrogenase, C-4 to C-12 straight chain	ACADM	14D	0.822487	0.00160244	Hs.445040	202502_at
choline kinase beta /// carnitine palmitoyltransferase 1B (muscle)	CHKB /// CPT1B	14D	0.62933	4.83376e-07	Hs.439777	210069_at
choline kinase beta /// carnitine palmitoyltransferase 1B (muscle)	CHKB /// CPT1B	14D	0.674794	2.24333e-09	Hs.439777	210070_s_at
dodecenoyl-Coenzyme A delta isomerase (3,2 trans-enoyl-Coenzyme A isomerase)	DCI	14D	0.791841	9.78464e-06	Hs.403436	209759_s_at
enoyl Coenzyme A hydratase 1, peroxisomal	ECH1	14D	0.781216	5.52219e-06	Hs.196176	200789_at
fatty acid desaturase 3	FADS3	14D	1.94352	0.000272344	Hs.21765	216080_s_at
hydroxyacyl-Coenzyme A dehydrogenase	HADH	14D	0.738008	5.04142e-06	Hs.438289	211569_s_at
hydroxyacyl-Coenzyme A dehydrogenase	HADH	14D	0.750303	0.000150111	Hs.438289	201036_s_at
hydroxyacyl-Coenzyme A dehydrogenase	HADH	14D	0.778005	6.50009e-05	Hs.438289	201035_s_at
hydroxyacyl-Coenzyme A dehydrogenase/3-ketoacyl-Coenzyme A thiolase/enoyl-Coenzyme A hydratase (trifunctional protein), alpha subunit	HADHA	14D	0.881985	0.000851854	Hs.516032	208631_s_at
hydroxyacyl-Coenzyme A dehydrogenase/3-ketoacyl-Coenzyme A thiolase/enoyl-Coenzyme A hydratase (trifunctional protein), alpha subunit	HADHA	14D	0.888559	0.00265106	Hs.516032	208630_at
hydroxyacyl-Coenzyme A dehydrogenase/3-ketoacyl-Coenzyme A thiolase/enoyl-Coenzyme A hydratase (trifunctional protein), beta subunit	HADHB	14D	0.821302	5.06213e-06	Hs.534639	201007_at
mitochondrial trans-2-enoyl-CoA reductase	MECR	14D	0.827095	2.53437e-05	Hs.183646	218664_at
mitochondrial translational release factor 1-like	MTRF1L	14D	0.842446	0.000928036	Hs.225836	225215_s_at
propionyl Coenzyme A carboxylase, beta polypeptide	PCCB	14D	0.787512	1.42746e-05	Hs.63788	212694_s_at

## Sheet: Mito-Metab
Mitochondrial Metabolism
Note: for atrophy analysis, the Ratio is defined as: Each 5 units of atrophy, expression changes by
Gene.Title	Gene.Symbol	Analysis	Ratio	rawp	UniGene.ID	TargetID
aldehyde dehydrogenase 2 family (mitochondrial)	ALDH2	Atrophy	1.27176	5.88101e-05	Hs.632733	201425_at
aldehyde dehydrogenase 2 family (mitochondrial)	ALDH2	48H	1.15232	1.68e-05	Hs.632733	201425_at
aminolevulinate, delta-, synthase 1	ALAS1	48H	0.724668	0.000187467	Hs.476308	205633_s_at
monoamine oxidase B	MAOB	48H	0.778892	1.62e-05	Hs.654473	204041_at
tafazzin (cardiomyopathy, dilated 3A (X-linked); endocardial fibroelastosis 2; Barth syndrome)	TAZ	48H	0.78486	5.92e-05	Hs.409911	37278_at
3-hydroxyisobutyrate dehydrogenase	HIBADH	14D	0.856419	0.000207229	Hs.406758	224812_at
3-hydroxymethyl-3-methylglutaryl-Coenzyme A lyase (hydroxymethylglutaricaciduria)	HMGCL	14D	0.918096	0.00236501	Hs.533444	202772_at
abhydrolase domain containing 10	ABHD10	14D	0.884069	0.000212905	Hs.477115	218633_x_at
adenylate kinase 3	AK3	14D	0.795844	0.0011674	Hs.493362	224151_s_at
adenylate kinase 3	AK3	14D	0.838175	1.26945e-05	Hs.493362	224655_at
alanine-glyoxylate aminotransferase 2-like 1	AGXT2L1	14D	0.597774	0.000259423	Hs.106576	221008_s_at
aldehyde dehydrogenase 2 family (mitochondrial)	ALDH2	14D	1.27601	2.67089e-05	Hs.632733	201425_at
aldehyde dehydrogenase 6 family, member A1	ALDH6A1	14D	0.83712	0.0016927	Hs.293970	221588_x_at
aminolevulinate, delta-, synthase 1	ALAS1	14D	0.639746	2.55225e-07	Hs.476308	205633_s_at
arginase, type II	ARG2	14D	2.03467	0.00204526	Hs.653205	203946_s_at
cardiolipin synthase 1	CRLS1	14D	0.858377	8.86155e-05	Hs.224764	223978_s_at
glycine cleavage system protein H (aminomethyl carrier) /// similar to Glycine cleavage system H protein, mitochondrial precursor	GCSH /// LOC654085 /// LOC730107	14D	0.84077	8.64727e-07	Hs.546256	213129_s_at
glycine cleavage system protein H (aminomethyl carrier) /// similar to Glycine cleavage system H protein, mitochondrial precursor	GCSH /// LOC730107	14D	0.844357	4.93968e-05	Hs.546256	213133_s_at
lipoic acid synthetase	LIAS	14D	0.748445	2.23959e-05	Hs.550502	214045_at
methylmalonyl Coenzyme A mutase	MUT	14D	0.865913	0.001471	Hs.485527	202960_s_at
monoamine oxidase A	MAOA	14D	0.590032	6.65717e-05	Hs.183109	204389_at
monoamine oxidase B	MAOB	14D	0.790618	0.00121738	Hs.654473	204041_at
Neurolysin (metallopeptidase M3 family)	NLN	14D	1.16781	0.00122574	Hs.247460	234762_x_at
neurolysin (metallopeptidase M3 family)	NLN	14D	1.23464	0.000582184	Hs.247460	225944_at
ornithine aminotransferase (gyrate atrophy)	OAT	14D	1.16556	6.70784e-06	Hs.523332	201599_at
ornithine decarboxylase antizyme 1	OAZ1	14D	1.08272	0.00188404	Hs.446427	215952_s_at
similar to Aspartate aminotransferase, mitochondrial precursor (Transaminase A) (Glutamate oxaloacetate transaminase 2)	LOC645538 /// LOC652318	14D	0.679454	5.29704e-06	Hs.647631	216545_at
tafazzin (cardiomyopathy, dilated 3A (X-linked); endocardial fibroelastosis 2; Barth syndrome)	TAZ	14D	0.697466	0.00104851	Hs.409911	203977_at
tafazzin (cardiomyopathy, dilated 3A (X-linked); endocardial fibroelastosis 2; Barth syndrome)	TAZ	14D	0.789684	1.74825e-06	Hs.409911	37278_at
thiosulfate sulfurtransferase (rhodanese)	TST	14D	0.774593	0.00165154	Hs.474783	209605_at
translocator protein (18kDa)	TSPO	14D	0.832076	0.000274681	Hs.202	202096_s_at

## Sheet: Mito-Chan
Mitochondrial Channel
Note: for atrophy analysis, the Ratio is defined as: Each 5 units of atrophy, expression changes by
Gene.Title	Gene.Symbol	Analysis	Ratio	rawp	UniGene.ID	TargetID
translocase of inner mitochondrial membrane 8 homolog A (yeast)	TIMM8A	Atrophy	0.532133	0.000104081	Hs.447877	205217_at
MRS2-like, magnesium homeostasis factor (S. cerevisiae)	MRS2L	Atrophy	0.844579	0.000121102	Hs.533291	218536_at
solute carrier family 25 (mitochondrial carrier; adenine nucleotide translocator), member 4	SLC25A4	Atrophy	0.777818	1.15469e-05	Hs.246506	202825_at
solute carrier family 25 (mitochondrial carrier; oxoglutarate carrier), member 11	SLC25A11	Atrophy	0.770611	0.000214596	Hs.184877	207088_s_at
solute carrier family 25 (mitochondrial carrier; phosphate carrier), member 3	SLC25A3	Atrophy	0.871834	2.6679e-05	Hs.290404	200030_s_at
uncoupling protein 3 (mitochondrial, proton carrier)	UCP3	48H	1.53071	0.0002944	Hs.101337	207349_s_at
MRS2-like, magnesium homeostasis factor (S. cerevisiae)	MRS2L	48H	0.844401	5.39e-06	Hs.533291	218536_at
solute carrier family 25 (mitochondrial carrier, Aralar), member 12	SLC25A12	48H	0.810781	0.000244856	Hs.470608	203340_s_at
solute carrier family 25 (mitochondrial carrier; oxoglutarate carrier), member 11	SLC25A11	48H	0.821882	0.000140056	Hs.184877	209003_at
solute carrier family 25, member 30	SLC25A30	48H	0.711871	2.32e-06	Hs.591230	226782_at
translocase of inner mitochondrial membrane 17 homolog A (yeast)	TIMM17A	48H	0.845915	2.1e-05	Hs.20716	215171_s_at
translocase of inner mitochondrial membrane 8 homolog A (yeast)	TIMM8A	48H	0.626506	8.79e-05	Hs.447877	205217_at
translocase of outer mitochondrial membrane 40 homolog (yeast)-like	TOMM40L	48H	0.636908	0.000102317	Hs.321653	226059_at
solute carrier family 25 (mitochondrial carrier, Aralar), member 12	SLC25A12	48H	0.787192	9.2e-05	Hs.470608	203339_at
ATP-binding cassette, sub-family F (GCN20), member 2	ABCF2	14D	1.29756	0.00199342	Hs.654958	207622_s_at
Brain protein 44	BRP44	14D	0.874269	0.00156609	Hs.517768	227669_at
brain protein 44	BRP44	14D	0.87548	6.63938e-06	Hs.517768	202427_s_at
chloride intracellular channel 4	CLIC4	14D	1.50184	0.000118717	Hs.440544	201560_at
metaxin 2	MTX2	14D	0.886979	5.48579e-05	Hs.470728	203517_at
MRS2-like, magnesium homeostasis factor (S. cerevisiae)	MRS2L	14D	0.787033	7.86921e-05	Hs.533291	218538_s_at
MRS2-like, magnesium homeostasis factor (S. cerevisiae)	MRS2L	14D	0.787078	3.20371e-07	Hs.533291	218536_at
Sideroflexin 4	SFXN4	14D	0.793989	0.000303044	Hs.655168	230637_at
sideroflexin 4	SFXN4	14D	0.88297	0.000462806	Hs.655168	225143_at
solute carrier family 25 (mitochondrial carrier, Aralar), member 12	SLC25A12	14D	0.672566	6.41778e-08	Hs.470608	203339_at
solute carrier family 25 (mitochondrial carrier, Aralar), member 12	SLC25A12	14D	0.803266	6.5457e-08	Hs.470608	203340_s_at
solute carrier family 25 (mitochondrial carrier; adenine nucleotide translocator), member 4	SLC25A4	14D	0.697868	6.4863e-08	Hs.246506	202825_at
solute carrier family 25 (mitochondrial carrier; oxoglutarate carrier), member 11	SLC25A11	14D	0.707259	1.3248e-06	Hs.184877	207088_s_at
solute carrier family 25 (mitochondrial carrier; oxoglutarate carrier), member 11	SLC25A11	14D	0.725474	7.16208e-08	Hs.184877	209003_at
solute carrier family 25 (mitochondrial carrier; phosphate carrier), member 3	SLC25A3	14D	0.811976	3.78046e-08	Hs.290404	200030_s_at
solute carrier family 25, member 30	SLC25A30	14D	0.497703	3.29982e-05	Hs.591230	238171_at
solute carrier family 25, member 30	SLC25A30	14D	0.66598	9.13215e-05	Hs.591230	226782_at
solute carrier family 25, member 42	SLC25A42	14D	0.835392	0.00214539	Hs.303669	226737_at
solute carrier family 25, member 44	SLC25A44	14D	0.783735	5.04792e-08	Hs.532375	212683_at
solute carrier family 41, member 1	SLC41A1	14D	0.696281	6.57196e-07	Hs.20274	225570_at
translocase of inner mitochondrial membrane 17 homolog A (yeast)	TIMM17A	14D	0.795544	6.3717e-07	Hs.20716	215171_s_at
translocase of inner mitochondrial membrane 17 homolog A (yeast)	TIMM17A	14D	0.865914	0.0015915	Hs.20716	201821_s_at
translocase of inner mitochondrial membrane 22 homolog (yeast)	TIMM22	14D	0.867616	0.00125954	Hs.592108	219184_x_at
translocase of inner mitochondrial membrane 23 homolog (yeast)	TIMM23	14D	0.772325	6.39093e-05	Hs.524308	218118_s_at
translocase of inner mitochondrial membrane 23 homolog (yeast)	TIMM23	14D	0.802035	2.03416e-07	Hs.524308	225535_s_at
translocase of inner mitochondrial membrane 23 homolog (yeast) /// similar to Mitochondrial import inner membrane translocase subunit Tim23	LOC653252 /// TIMM23	14D	0.907138	0.000486519	Hs.499594	218119_at
translocase of inner mitochondrial membrane 44 homolog (yeast)	TIMM44	14D	0.679604	0.0018935	Hs.465784	203092_at
translocase of inner mitochondrial membrane 50 homolog (S. cerevisiae)	TIMM50	14D	0.803585	0.00012909	Hs.590956	224913_s_at
translocase of inner mitochondrial membrane 8 homolog A (yeast)	TIMM8A	14D	0.623608	0.000998543	Hs.447877	205217_at
translocase of outer mitochondrial membrane 40 homolog (yeast)-like	TOMM40L	14D	0.528147	4.62843e-05	Hs.321653	226059_at
translocase of outer mitochondrial membrane 7 homolog (yeast) /// hypothetical protein LOC201725	LOC201725 /// TOMM7	14D	0.874826	0.000236895	Hs.380920	201812_s_at
voltage-dependent anion channel 1	VDAC1	14D	0.831821	5.80598e-06	Hs.519320	217140_s_at
voltage-dependent anion channel 1	VDAC1	14D	0.842583	2.51886e-05	Hs.519320	212038_s_at
voltage-dependent anion channel 2	VDAC2	14D	0.80934	3.25156e-09	Hs.355927	211662_s_at
voltage-dependent anion channel 3	VDAC3	14D	0.866165	7.07041e-05	Hs.655340	208846_s_at
voltage-dependent anion channel 3	VDAC3	14D	0.870806	3.6115e-05	Hs.655340	208845_at

## Sheet: FA. Metab
Fatty Acid Metabolism
Note: for atrophy analysis, the Ratio is defined as: Each 5 units of atrophy, expression changes by
Gene.Title	Gene.Symbol	Analysis	Ratio	rawp	UniGene.ID	TargetID
phospholipase C, beta 1 (phosphoinositide-specific)	PLCB1	Atrophy	0.637061	3.9546e-06	Hs.431173	213222_at
acetyl-Coenzyme A acyltransferase 1 (peroxisomal 3-oxoacyl-Coenzyme A thiolase)	ACAA1	14D	0.82757	0.000120087	Hs.643487	214274_s_at
acyl-CoA thioesterase 11	ACOT11	14D	0.756684	0.000108475	Hs.234786	216103_at
fatty acid binding protein 3, muscle and heart (mammary-derived growth inhibitor)	FABP3	14D	0.593143	1.18325e-08	Hs.657242	205738_s_at
fatty acid binding protein 3, muscle and heart (mammary-derived growth inhibitor)	FABP3	14D	0.639387	8.78314e-05	Hs.657242	214285_at
patatin-like phospholipase domain containing 2	PNPLA2	14D	0.832521	0.000381151	Hs.654697	39854_r_at
patatin-like phospholipase domain containing 4	PNPLA4	14D	0.803293	0.000115921	Hs.264	209740_s_at
peroxisomal D3,D2-enoyl-CoA isomerase	PECI	14D	0.724576	9.51308e-08	Hs.15250	218025_s_at

## Sheet: Glycolysis
Glycolysis
Note: for atrophy analysis, the Ratio is defined as: Each 5 units of atrophy, expression changes by
Gene.Title	Gene.Symbol	Analysis	Ratio	rawp	UniGene.ID	TargetID
phosphorylase kinase, alpha 1 (muscle)	PHKA1	Atrophy	0.746643	8.63179e-05	Hs.201379	205450_at
fructose-1,6-bisphosphatase 2	FBP2	Atrophy	0.60229	7.48134e-05	Hs.61255	206844_at
glycerol-3-phosphate dehydrogenase 1-like	GPD1L	Atrophy	0.687457	3.53989e-06	Hs.82432	212510_at
lactate dehydrogenase A	LDHA	Atrophy	0.790209	0.000141586	Hs.2795	200650_s_at
phosphoglycerate mutase 2 (muscle)	PGAM2	Atrophy	0.517517	0.000125014	Hs.632642	205736_at
triosephosphate isomerase 1	TPI1	Atrophy	0.766637	1.0133e-05	Hs.524219	213011_s_at
triosephosphate isomerase 1	TPI1	Atrophy	0.778018	1.49922e-05	Hs.524219	200822_x_at
phosphoglycerate kinase 1	PGK1	Atrophy	0.877493	9.62167e-05	Hs.654578	200738_s_at
Phosphorylase kinase, alpha 1 (muscle)	PHKA1	Atrophy	0.689793	0.000191256	Hs.201379	229876_at
6-phosphofructo-2-kinase/fructose-2,6-biphosphatase 3	PFKFB3	48H	3.50262	8.43e-05	Hs.195471	202464_s_at
fructose-1,6-bisphosphatase 2	FBP2	48H	0.759645	3.19e-06	Hs.61255	206844_at
glucose phosphate isomerase	GPI	48H	0.830721	3.78e-06	Hs.466471	208308_s_at
triosephosphate isomerase 1	TPI1	48H	0.376242	2.02e-05	Hs.524219	210050_at
hexokinase 2	HK2	48H	0.554611	9.14e-05	Hs.591588	202934_at
lactate dehydrogenase C	LDHC	48H	0.472984	5.63e-05	Hs.654377	207022_s_at
lactate dehydrogenase A	LDHA	48H	0.767398	4.84e-07	Hs.2795	200650_s_at
triosephosphate isomerase 1	TPI1	48H	0.786939	4.4e-08	Hs.524219	213011_s_at
triosephosphate isomerase 1	TPI1	48H	0.811611	5.85e-06	Hs.524219	200822_x_at
6-phosphofructo-2-kinase/fructose-2,6-biphosphatase 2	PFKFB2	14D	0.50181	0.00213547	Hs.282702	207931_s_at
aldolase A, fructose-bisphosphate	ALDOA	14D	0.737409	1.42727e-05	Hs.513490	238996_x_at
aldolase A, fructose-bisphosphate	ALDOA	14D	0.88485	0.00165756	Hs.513490	200966_x_at
dicarbonyl/L-xylulose reductase	DCXR	14D	0.828956	0.000200724	Hs.9857	217973_at
enolase 3 (beta, muscle)	ENO3	14D	0.695077	0.00167442	Hs.224171	237691_x_at
enolase 3 (beta, muscle)	ENO3	14D	0.760366	7.99974e-06	Hs.224171	204483_at
fructose-1,6-bisphosphatase 2	FBP2	14D	0.519446	9.96519e-07	Hs.61255	206844_at
glucose phosphate isomerase	GPI	14D	0.777017	3.16111e-07	Hs.466471	208308_s_at
glycerol-3-phosphate dehydrogenase 1 (soluble)	GPD1	14D	1.1427	0.0023572	Hs.524418	213706_at
glycerol-3-phosphate dehydrogenase 1-like	GPD1L	14D	0.655418	1.73619e-06	Hs.82432	212510_at
hexokinase 2	HK2	14D	0.569988	0.000101532	Hs.591588	202934_at
ketohexokinase (fructokinase)	KHK	14D	0.858156	0.00114606	Hs.567297	205175_s_at
lactate dehydrogenase A	LDHA	14D	0.732478	1.06484e-06	Hs.2795	200650_s_at
lactate dehydrogenase B	LDHB	14D	0.745742	2.73464e-06	Hs.446149	213564_x_at
lactate dehydrogenase B	LDHB	14D	0.760072	2.89766e-05	Hs.446149	201030_x_at
phosphofructokinase, platelet	PFKP	14D	1.63781	4.46702e-06	Hs.26010	201037_at
phosphoglycerate mutase 2 (muscle)	PGAM2	14D	0.44416	2.81886e-06	Hs.632642	205736_at
phosphohistidine phosphatase 1	PHPT1	14D	0.829363	2.27694e-06	Hs.409834	223207_x_at
Phosphorylase kinase, alpha 1 (muscle)	PHKA1	14D	0.760878	0.0014982	Hs.201379	229876_at
phosphorylase kinase, alpha 1 (muscle)	PHKA1	14D	0.790685	0.000462413	Hs.201379	205450_at
phosphorylase, glycogen; muscle (McArdle syndrome, glycogen storage disease type V)	PYGM	14D	0.889991	0.00239259	Hs.154084	205577_at
pyruvate dehydrogenase (lipoamide) alpha 1	PDHA1	14D	0.741101	1.3517e-08	Hs.530331	200980_s_at
pyruvate dehydrogenase (lipoamide) alpha 1	PDHA1	14D	0.758082	2.33594e-06	Hs.530331	1555864_s_at
pyruvate dehydrogenase (lipoamide) beta	PDHB	14D	0.862782	2.2292e-05	Hs.161357	211023_at
pyruvate dehydrogenase (lipoamide) beta	PDHB	14D	0.886917	0.000826681	Hs.161357	208911_s_at
pyruvate dehydrogenase complex, component X	PDHX	14D	0.853252	0.000316581	Hs.502315	203067_at
pyruvate dehydrogenase kinase, isozyme 2	PDK2	14D	0.743887	2.67785e-06	Hs.256667	202590_s_at
pyruvate dehydrogenase kinase, isozyme 2	PDK2	14D	0.790284	0.000226613	Hs.256667	213724_s_at
pyruvate kinase, liver and RBC	PKLR	14D	0.733605	0.00140121	Hs.95990	207858_s_at
pyruvate kinase, muscle	PKM2	14D	0.655094	1.34558e-06	Hs.534770	201251_at
triosephosphate isomerase 1	TPI1	14D	0.462798	3.49662e-05	Hs.524219	210050_at
triosephosphate isomerase 1	TPI1	14D	0.67944	4.63787e-08	Hs.524219	213011_s_at
triosephosphate isomerase 1	TPI1	14D	0.700287	8.61254e-08	Hs.524219	200822_x_at

## Sheet: Receptors
Cell Surface Receptors
Note: for atrophy analysis, the Ratio is defined as: Each 5 units of atrophy, expression changes by
Gene.Title	Gene.Symbol	Analysis	Ratio	rawp	UniGene.ID	TargetID
CD81 molecule	CD81	Atrophy	1.30226	0.000179215	Hs.54457	200675_at
cholinergic receptor, nicotinic, delta	CHRND	Atrophy	3.17375	0.000184969	Hs.156289	207024_at
F11 receptor	F11R	Atrophy	1.44315	2.81355e-06	Hs.517293	226482_s_at
low density lipoprotein receptor-related protein 10	LRP10	Atrophy	1.38446	0.000179799	Hs.525232	201412_at
interferon gamma receptor 1	IFNGR1	Atrophy	1.18712	0.000132227	Hs.520414	211676_s_at
olfactory receptor, family 7, subfamily E, member 37 pseudogene	OR7E37P	Atrophy	0.707009	0.000174214	---	217499_x_at
synaptogyrin 1	SYNGR1	Atrophy	0.800048	5.62008e-05	Hs.216226	210613_s_at
very low density lipoprotein receptor	VLDLR	Atrophy	0.753453	7.17552e-05	Hs.370422	209822_s_at
cortexin 3	CTXN3	Atrophy	0.559542	0.000186904	Hs.66194	236374_at
G antigen 2 /// G antigen 4 /// G antigen 5 /// G antigen 6 /// G antigen 7 /// G antigen 7B /// G antigen 12G /// G antigen 12C /// G antigen 12E /// G antigen 12H /// similar to GAGE-2 protein (G antigen 2)	GAGE12C /// GAGE12E /// GAGE12G /// GAGE12H /// GAGE2 /// GAGE4 /// GAGE5 /// GAGE6 /// GAGE7 /// GAGE7B /// LOC729447	Atrophy	0.513775	0.000191683	Hs.645552	206640_x_at
olfactory receptor, family 7, subfamily E, member 47 pseudogene	OR7E47P	Atrophy	0.559709	6.70666e-05	Hs.524431	222304_x_at
olfactory receptor, family 2, subfamily F, member 1	OR2F1	Atrophy	0.362762	0.000146333	Hs.553595	208526_at
angiotensin II receptor, type 1	AGTR1	48H	1.23058	0.000284098	Hs.477887	205357_s_at
cadherin, EGF LAG seven-pass G-type receptor 2 (flamingo homolog, Drosophila)	CELSR2	48H	1.1463	9.02e-05	Hs.57652	204029_at
cadherin, EGF LAG seven-pass G-type receptor 2 (flamingo homolog, Drosophila)	CELSR2	48H	1.23128	2.78e-05	Hs.57652	36499_at
discoidin domain receptor family, member 1	DDR1	48H	1.31129	9.33e-05	Hs.631988	1007_s_at
growth hormone receptor	GHR	48H	1.22447	0.00011599	Hs.125180	205498_at
integrin, beta 5	ITGB5	48H	1.23741	0.000268945	Hs.536663	201125_s_at
interleukin 6 receptor	IL6R	48H	1.6176	5.89e-06	Hs.591492	205945_at
interleukin 6 receptor	IL6R	48H	1.72962	1.62e-09	Hs.591492	226333_at
peripheral myelin protein 22	PMP22	48H	1.37174	2.68e-05	Hs.372031	210139_s_at
tetraspanin 8	TSPAN8	48H	1.52857	4.22e-05	Hs.170563	203824_at
cholinergic receptor, nicotinic, alpha 1 (muscle)	CHRNA1	48H	1.76245	7.23e-05	Hs.434479	206633_at
CD9 molecule	CD9	48H	0.76101	5.73e-05	Hs.114286	201005_at
G protein-coupled receptor 157	GPR157	48H	0.731162	3.77e-06	Hs.31181	227970_at
integrin beta 1 binding protein (melusin) 2	ITGB1BP2	48H	0.677233	2.42e-06	Hs.109999	219829_at
olfactory receptor, family 7, subfamily E, member 37 pseudogene	OR7E37P	48H	0.766058	1.38e-06	---	217499_x_at
glutamate receptor, ionotropic, N-methyl D-aspartate-like 1A /// GRINL1A combined protein /// similar to glutamate receptor, ionotropic, N-methyl D-aspartate-like 1A isoform 1	Gcom1 /// GRINL1A /// LOC339970	48H	0.869178	0.000434879	Hs.567849	212241_at
integrin, beta 6	ITGB6	48H	0.668084	0.000341834	Hs.470399	208083_s_at
myeloid-associated differentiation marker	MYADM	48H	0.752062	0.000210544	Hs.380906	225673_at
Phospholamban	PLN	48H	0.782468	0.00026981	Hs.170839	228202_at
progestin and adipoQ receptor family member IX	PAQR9	48H	0.549079	5.05e-05	Hs.656111	1558322_a_at
STT3, subunit of the oligosaccharyltransferase complex, homolog B (S. cerevisiae)	STT3B	48H	0.839198	0.000212836	Hs.475812	224700_at
very low density lipoprotein receptor	VLDLR	48H	0.821719	0.000380952	Hs.370422	209822_s_at
olfactory receptor, family 7, subfamily E, member 47 pseudogene	OR7E47P	48H	0.624482	3.61e-05	Hs.524431	222304_x_at
potassium voltage-gated channel, shaker-related subfamily, member 7	KCNA7	48H	0.524479	5.31e-05	Hs.306973	232936_at
progesterone receptor membrane component 2	PGRMC2	48H	0.825602	0.000110307	Hs.507910	213227_at
adhesion regulating molecule 1	ADRM1	14D	1.17972	0.00230826	Hs.90107	201281_at
angiotensin II receptor, type 1	AGTR1	14D	1.34039	2.93122e-06	Hs.477887	205357_s_at
CD109 molecule	CD109	14D	1.31183	0.00178862	Hs.399891	226545_at
CD151 molecule (Raph blood group)	CD151	14D	1.39427	0.00178408	Hs.654379	204306_s_at
CD44 molecule (Indian blood group)	CD44	14D	1.27392	0.00238493	Hs.502328	209835_x_at
CD47 molecule	CD47	14D	1.17784	0.00106904	Hs.446414	227259_at
CD59 molecule, complement regulatory protein	CD59	14D	1.14176	8.97582e-07	Hs.278573	200984_s_at
CD59 molecule, complement regulatory protein	CD59	14D	1.14197	0.000465119	Hs.278573	200983_x_at
CD9 molecule	CD9	14D	0.800672	0.00104415	Hs.114286	201005_at
CD99 molecule	CD99	14D	1.15831	0.000847135	Hs.654354	201028_s_at
cholinergic receptor, nicotinic, alpha 1 (muscle)	CHRNA1	14D	2.02883	1.66248e-06	Hs.434479	211039_at
cholinergic receptor, nicotinic, alpha 1 (muscle)	CHRNA1	14D	3.94489	1.37829e-07	Hs.434479	206633_at
Cholinergic receptor, nicotinic, alpha 10	CHRNA10	14D	0.747083	0.000662947	Hs.157714	1568675_at
cholinergic receptor, nicotinic, beta 1 (muscle)	CHRNB1	14D	1.21223	0.00125376	Hs.330386	206703_at
cholinergic receptor, nicotinic, delta	CHRND	14D	3.60796	1.5431e-05	Hs.156289	207024_at
contactin 1	CNTN1	14D	0.590302	0.00110666	Hs.143434	1554784_at
discoidin domain receptor family, member 1	DDR1	14D	1.22215	0.00136506	Hs.631988	1007_s_at
discoidin domain receptor family, member 1	DDR1	14D	1.24235	0.00134726	Hs.631988	208779_x_at
discoidin domain receptor family, member 1	DDR1	14D	1.26188	0.000101571	Hs.631988	207169_x_at
ephrin-B3	EFNB3	14D	0.840383	0.000645232	Hs.26988	210883_x_at
epidermal growth factor receptor (erythroblastic leukemia viral (v-erb-b) oncogene homolog, avian)	EGFR	14D	0.768179	0.00156903	Hs.488293	211550_at
F11 receptor	F11R	14D	1.39611	3.14185e-05	Hs.517293	226482_s_at
Fc fragment of IgG, low affinity IIb, receptor (CD32)	FCGR2B	14D	1.94531	0.000728102	Hs.654395	210889_s_at
FXYD domain containing ion transport regulator 5	FXYD5	14D	1.317	0.00125411	Hs.333418	218084_x_at
G antigen 2 /// G antigen 4 /// G antigen 5 /// G antigen 6 /// G antigen 7 /// G antigen 7B /// G antigen 12G /// G antigen 12C /// G antigen 12E /// G antigen 12H /// similar to GAGE-2 protein (G antigen 2)	GAGE12C /// GAGE12E /// GAGE12G /// GAGE12H /// GAGE2 /// GAGE4 /// GAGE5 /// GAGE6 /// GAGE7 /// GAGE7B /// LOC729447	14D	0.623175	0.00204048	Hs.645552	206640_x_at
G protein-coupled receptor 114	GPR114	14D	0.778009	0.000362726	Hs.187884	1555447_at
G protein-coupled receptor 157	GPR157	14D	0.683504	3.10297e-07	Hs.31181	227970_at
G protein-coupled receptor 26	GPR26	14D	0.547306	0.00241017	Hs.12751	244617_at
G protein-coupled receptor 98	GPR98	14D	0.418096	5.08329e-06	Hs.591777	223582_at
gamma-aminobutyric acid (GABA) A receptor, beta 2	GABRB2	14D	0.625457	0.00119621	Hs.303527	207352_s_at
glutamate receptor, ionotropic, N-methyl D-aspartate 1 /// similar to glutamate receptor, ionotropic, N-methyl D-aspartate 1	GRIN1 /// LOC731701	14D	0.765671	0.000665044	Hs.558334	205914_s_at
GRINL1A combined protein	Gcom1	14D	0.744524	0.0005452	Hs.437256	228568_at
growth hormone receptor	GHR	14D	1.19336	0.000323764	Hs.125180	205498_at
HLA-G histocompatibility antigen, class I, G	HLA-G	14D	1.16	0.00250699	Hs.512152	211529_x_at
immunoglobulin heavy constant alpha 1 /// immunoglobulin heavy constant alpha 2 (A2m marker) /// immunoglobulin heavy constant gamma 1 (G1m marker) /// immunoglobulin heavy constant mu /// immunoglobulin heavy variable 4-31	IGHA1 /// IGHA2 /// IGHG1 /// IGHM /// IGHV4-31	14D	0.55468	0.000970935	Hs.648398	211636_at
inositol 1,4,5-triphosphate receptor, type 1	ITPR1	14D	1.99774	0.0013203	Hs.567295	216944_s_at
integrin alpha FG-GAP repeat containing 1	ITFG1	14D	1.11423	0.00124855	Hs.42217	221449_s_at
integrin beta 1 binding protein (melusin) 2	ITGB1BP2	14D	0.673313	0.00010407	Hs.109999	219829_at
integrin beta 3 binding protein (beta3-endonexin)	ITGB3BP	14D	0.85097	0.000656816	Hs.166539	205176_s_at
integrin, alpha 9	ITGA9	14D	0.638123	0.0015388	Hs.113157	1555336_a_at
integrin, alpha E (antigen CD103, human mucosal lymphocyte antigen 1; alpha polypeptide)	ITGAE	14D	0.788048	0.000758314	Hs.513867	205055_at
integrin, beta 1 (fibronectin receptor, beta polypeptide, antigen CD29 includes MDF2, MSK12)	ITGB1	14D	1.14659	6.15648e-05	Hs.643813	211945_s_at
integrin, beta 1 (fibronectin receptor, beta polypeptide, antigen CD29 includes MDF2, MSK12)	ITGB1	14D	1.20078	0.000907593	Hs.643813	216178_x_at
integrin, beta 1 (fibronectin receptor, beta polypeptide, antigen CD29 includes MDF2, MSK12)	ITGB1	14D	1.2106	0.000368639	Hs.643813	1553678_a_at
integrin, beta 1 (fibronectin receptor, beta polypeptide, antigen CD29 includes MDF2, MSK12)	ITGB1	14D	1.2653	0.000399299	Hs.643813	1553530_a_at
integrin, beta 2 (complement component 3 receptor 3 and 4 subunit)	ITGB2	14D	1.42068	0.000581785	Hs.375957	202803_s_at
integrin, beta 5	ITGB5	14D	1.29584	0.000179966	Hs.536663	201125_s_at
interferon gamma receptor 1	IFNGR1	14D	1.08672	0.000328907	Hs.520414	202727_s_at
interferon regulatory factor 7	IRF7	14D	1.44271	0.000398457	Hs.166120	208436_s_at
interleukin 1 receptor, type I	IL1R1	14D	1.19513	0.000458304	Hs.557403	202948_at
interleukin 10 receptor, beta	IL10RB	14D	0.874329	0.0010555	Hs.654593	209575_at
interleukin 11 receptor, alpha	IL11RA	14D	0.873955	0.00178741	Hs.591088	204773_at
interleukin 17 receptor C	IL17RC	14D	0.795204	0.00209226	Hs.129959	224514_x_at
interleukin 6 receptor	IL6R	14D	1.29119	0.000242081	Hs.591492	226333_at
interleukin 9 receptor /// similar to Interleukin-9 receptor precursor (IL-9R) (CD129 antigen)	IL9R /// LOC729486	14D	0.793202	0.000663394	Hs.660665	217212_s_at
IQ motif containing GTPase activating protein 1	IQGAP1	14D	1.19722	9.8249e-05	Hs.430551	210840_s_at
leukemia inhibitory factor receptor alpha	LIFR	14D	1.23228	0.00133596	Hs.133421	225575_at
Lin-7 homolog A (C. elegans)	LIN7A	14D	0.25493	7.92793e-05	Hs.144333	241652_x_at
low density lipoprotein receptor (familial hypercholesterolemia)	LDLR	14D	0.688588	0.000793239	Hs.213289	217005_at
low density lipoprotein receptor-related protein 11	LRP11	14D	1.31759	0.000873778	Hs.408355	225060_at
major histocompatibility complex, class I, A	HLA-A	14D	1.2184	0.000583461	Hs.181244	213932_x_at
major histocompatibility complex, class I, A	HLA-A	14D	1.21985	0.00015905	Hs.181244	215313_x_at
major histocompatibility complex, class I, B	HLA-B	14D	1.24128	0.000424521	Hs.77961	209140_x_at
major histocompatibility complex, class I, B	HLA-B	14D	1.2684	2.84668e-05	Hs.77961	211911_x_at
major histocompatibility complex, class I, B	HLA-B	14D	1.30302	2.19832e-05	Hs.77961	208729_x_at
major histocompatibility complex, class I, C	HLA-C	14D	1.19171	0.001118	Hs.654404	216526_x_at
major histocompatibility complex, class I, C	HLA-C	14D	1.27706	0.000444783	Hs.654404	214459_x_at
major histocompatibility complex, class I, C	HLA-C	14D	1.29037	3.49235e-05	Hs.654404	211799_x_at
major histocompatibility complex, class I, F	HLA-F	14D	1.14075	0.00194561	Hs.519972	221875_x_at
major histocompatibility complex, class II, DR alpha	HLA-DRA	14D	1.39198	0.00121016	Hs.520048	210982_s_at
matrix metallopeptidase 14 (membrane-inserted)	MMP14	14D	0.59115	0.00131411	Hs.2399	217279_x_at
membrane protein, palmitoylated 6 (MAGUK p55 subfamily member 6)	MPP6	14D	2.46442	0.000177781	Hs.533355	205429_s_at
monocyte to macrophage differentiation-associated	MMD	14D	1.67865	0.00253252	Hs.463483	244523_at
mucin 17, cell surface associated	MUC17	14D	0.78065	0.000124644	Hs.271819	232407_at
Mucin 4, cell surface associated	MUC4	14D	0.682585	0.00126212	Hs.653873	235055_x_at
natural cytotoxicity triggering receptor 2	NCR2	14D	0.719391	0.00179129	Hs.194721	221075_s_at
natural killer-tumor recognition sequence	NKTR	14D	1.1589	0.00103137	Hs.529509	202379_s_at
natural killer-tumor recognition sequence	NKTR	14D	1.26505	0.00115033	Hs.529509	215338_s_at
neurexin 3	NRXN3	14D	2.29367	0.00177693	Hs.368307	229649_at
nischarin	NISCH	14D	1.26987	1.76586e-05	Hs.435290	201591_s_at
olfactory receptor, family 10, subfamily A, member 3	OR10A3	14D	1.59476	0.0024189	Hs.381322	1567251_at
olfactory receptor, family 7, subfamily E, member 37 pseudogene	OR7E37P	14D	0.675495	1.16143e-05	---	217499_x_at
olfactory receptor, family 7, subfamily E, member 47 pseudogene	OR7E47P	14D	0.651443	0.000955157	Hs.524431	222304_x_at
opsin 3 (encephalopsin, panopsin)	OPN3	14D	0.553973	0.000890076	Hs.534399	224392_s_at
opsin 3 (encephalopsin, panopsin)	OPN3	14D	0.770097	9.35816e-07	Hs.534399	219032_x_at
paired immunoglobin-like type 2 receptor beta	PILRB	14D	1.29918	4.41548e-05	Hs.632314	225321_s_at
phospholamban	PLN	14D	0.762584	4.38049e-06	Hs.170839	204938_s_at
Phospholamban	PLN	14D	0.775424	3.61981e-05	Hs.170839	228202_at
phospholamban	PLN	14D	0.786653	2.23319e-05	Hs.170839	204939_s_at
phospholamban	PLN	14D	0.814638	0.000201255	Hs.170839	204940_at
progesterone receptor membrane component 1	PGRMC1	14D	1.16504	7.0426e-05	Hs.90061	201121_s_at
progesterone receptor membrane component 2	PGRMC2	14D	0.773467	2.03522e-06	Hs.507910	213227_at
progestin and adipoQ receptor family member IV	PAQR4	14D	0.451472	0.000754109	Hs.351474	212858_at
progestin and adipoQ receptor family member IX	PAQR9	14D	0.561274	2.49711e-05	Hs.656111	1558322_a_at
PTPRF interacting protein, binding protein 1 (liprin beta 1)	PPFIBP1	14D	0.904214	0.000585654	Hs.172445	203735_x_at
ret proto-oncogene	RET	14D	0.592476	1.47919e-05	Hs.350321	211421_s_at
retinitis pigmentosa 9 (autosomal dominant)	RP9	14D	0.85781	0.000720105	Hs.326805	227852_at
retinitis pigmentosa 9 (autosomal dominant) /// retinitis pigmentosa 9 pseudogene	LOC441212 /// RP9	14D	0.891074	0.00283101	Hs.326805	227640_s_at
roundabout, axon guidance receptor, homolog 1 (Drosophila)	ROBO1	14D	1.39367	0.000250754	Hs.13640	213194_at
scavenger receptor class B, member 2	SCARB2	14D	1.16025	4.47798e-05	Hs.349656	224983_at
scavenger receptor class B, member 2	SCARB2	14D	1.17069	0.000763262	Hs.349656	201646_at
Scavenger receptor class F, member 2	SCARF2	14D	0.691144	0.000770836	Hs.474251	241691_at
SEC14-like 1 (S. cerevisiae)	SEC14L1	14D	1.70043	0.000857739	Hs.464184	202083_s_at
solute carrier family 40 (iron-regulated transporter), member 1	SLC40A1	14D	1.23816	0.00165198	Hs.643005	223044_at
steroid 5 alpha-reductase 2-like	SRD5A2L	14D	1.26625	4.55205e-05	Hs.590906	222750_s_at
stromal interaction molecule 2	STIM2	14D	1.23705	0.00238486	Hs.135763	234140_s_at
succinate receptor 1	SUCNR1	14D	2.42356	0.000433893	Hs.279575	223939_at
synaptogyrin 1	SYNGR1	14D	0.776714	5.84434e-06	Hs.216226	210613_s_at
synaptojanin 1	SYNJ1	14D	1.26876	0.00124173	Hs.473632	212990_at
tetraspanin 3	TSPAN3	14D	1.17056	4.13632e-05	Hs.5062	200972_at
tetraspanin 3	TSPAN3	14D	1.2347	1.9586e-05	Hs.5062	200973_s_at
tetraspanin 4	TSPAN4	14D	1.76187	0.000830345	Hs.654836	209264_s_at
tetraspanin 8	TSPAN8	14D	1.34823	0.00268649	Hs.170563	203824_at
transforming growth factor, beta receptor I (activin A receptor type II-like kinase, 53kDa)	TGFBR1	14D	1.24865	0.000758754	Hs.494622	224793_s_at
transmembrane protein with EGF-like and two follistatin-like domains 2	TMEFF2	14D	2.32766	2.66812e-05	Hs.144513	223557_s_at
triggering receptor expressed on myeloid cells-like 3	TREML3	14D	0.550377	0.000425538	Hs.93698	1557444_at
tumor-associated calcium signal transducer 2	TACSTD2	14D	0.683265	0.000290252	Hs.23582	202285_s_at
Tyrosine kinase with immunoglobulin-like and EGF-like domains 1	TIE1	14D	0.480649	0.00149217	Hs.78824	1560657_at
very low density lipoprotein receptor	VLDLR	14D	0.771368	0.000101131	Hs.370422	209822_s_at

## Sheet: TF-Sign
Signaling Molecules and Transcription Factors
Note: for atrophy analysis, the Ratio is defined as: Each 5 units of atrophy, expression changes by
Gene.Title	Gene.Symbol	Analysis	Ratio	rawp	UniGene.ID	TargetID
cyclic AMP phosphoprotein, 19 kD	ARPP-19	Atrophy	1.28736	0.000157386	Hs.512908	221482_s_at
cyclin G2	CCNG2	Atrophy	1.85171	9.05122e-05	Hs.13291	202769_at
diacylglycerol kinase, zeta 104kDa	DGKZ	Atrophy	1.34541	3.53086e-05	Hs.502461	207556_s_at
glycosylphosphatidylinositol anchor attachment protein 1 homolog (yeast)	GPAA1	Atrophy	1.26966	0.000161251	Hs.627962	215690_x_at
paired box gene 3 (Waardenburg syndrome 1)	PAX3	Atrophy	1.54581	7.19598e-05	Hs.42146	231666_at
paired related homeobox 1	PRRX1	Atrophy	1.44503	2.75697e-05	Hs.283416	226695_at
ras homolog gene family, member B	RHOB	Atrophy	1.50858	3.76015e-05	Hs.502876	212099_at
tripartite motif-containing 54	TRIM54	Atrophy	1.33239	6.73808e-05	Hs.516036	233669_s_at
acidic (leucine-rich) nuclear phosphoprotein 32 family, member B	ANP32B	Atrophy	1.35612	0.000155102	Hs.494604	201306_s_at
endothelial differentiation-related factor 1	EDF1	Atrophy	1.25578	5.54405e-05	Hs.174050	209058_at
SCY1-like 1 (S. cerevisiae)	SCYL1	Atrophy	1.37195	0.000181215	Hs.238839	223033_s_at
Sjogren's syndrome/scleroderma autoantigen 1	SSSCA1	Atrophy	1.96804	5.63176e-05	Hs.654840	203114_at
TANK-binding kinase 1	TBK1	Atrophy	1.2105	9.72241e-06	Hs.505874	218520_at
TBC1 domain family, member 22A	TBC1D22A	Atrophy	1.32427	5.256e-05	Hs.435044	33778_at
tribbles homolog 3 (Drosophila)	TRIB3	Atrophy	2.85942	0.000155449	Hs.516826	1555788_a_at
AKT interacting protein	AKTIP	Atrophy	0.817658	8.02519e-05	Hs.380897	223894_s_at
glioblastoma amplified sequence	GBAS	Atrophy	0.870632	0.000197971	Hs.591069	201816_s_at
nudix (nucleoside diphosphate linked moiety X)-type motif 3	NUDT3	Atrophy	0.835008	4.55028e-05	Hs.188882	221579_s_at
protein phosphatase 2 (formerly 2A), regulatory subunit B'', alpha	PPP2R3A	Atrophy	0.72933	0.000182504	Hs.518155	207749_s_at
protein tyrosine phosphatase-like (proline instead of catalytic arginine), member A	PTPLA	Atrophy	0.652676	5.10762e-08	Hs.114062	219654_at
Ras-related GTP binding D	RRAGD	Atrophy	0.738689	1.08904e-05	Hs.485938	221523_s_at
zinc finger protein 639	ZNF639	Atrophy	0.736145	0.000154319	Hs.632578	222624_s_at
dual specificity phosphatase 28	DUSP28	Atrophy	0.717083	4.18194e-05	Hs.369297	229211_at
Homeodomain interacting protein kinase 2	HIPK2	Atrophy	0.748075	2.20892e-06	Hs.397465	225368_at
leucine rich repeat (in FLII) interacting protein 1	LRRFIP1	Atrophy	0.816309	0.000142412	Hs.471779	223492_s_at
PDZ and LIM domain 5	PDLIM5	Atrophy	0.805448	1.93945e-05	Hs.480311	221994_at
SH3-binding domain kinase 1	SBK1	Atrophy	0.702961	3.64476e-05	Hs.97837	226548_at
SH3-binding domain kinase 1	SBK1	Atrophy	0.716957	1.9679e-05	Hs.97837	226549_at
AKT interacting protein	AKTIP	Atrophy	0.760555	2.96989e-06	Hs.380897	218373_at
APAF1 interacting protein	APIP	Atrophy	0.664165	4.10618e-06	Hs.447794	218698_at
cyclin G1	CCNG1	Atrophy	0.649098	6.95563e-05	Hs.79101	208796_s_at
HRAS-like suppressor	HRASLS	Atrophy	0.741944	0.000152749	Hs.36761	219984_s_at
LIM domain only 1 (rhombotin 1)	LMO1	Atrophy	0.670233	6.4027e-05	Hs.654426	206718_at
protein phosphatase 1, regulatory (inhibitor) subunit 1A	PPP1R1A	Atrophy	0.723011	0.000135369	Hs.505662	205478_at
protein phosphatase 2 (formerly 2A), regulatory subunit B'', alpha	PPP2R3A	Atrophy	0.684907	4.6323e-05	Hs.518155	209632_at
protein phosphatase 2 (formerly 2A), regulatory subunit B'', alpha	PPP2R3A	Atrophy	0.710286	4.94136e-07	Hs.518155	209633_at
protein phosphatase 2C, magnesium-dependent, catalytic subunit	PPM2C	Atrophy	0.561043	1.57147e-05	Hs.22265	222572_at
protein phosphatase 2C, magnesium-dependent, catalytic subunit	PPM2C	Atrophy	0.586126	3.04557e-06	Hs.22265	218273_s_at
RAS guanyl releasing protein 3 (calcium and DAG-regulated)	RASGRP3	Atrophy	0.688991	8.09596e-05	Hs.143674	205801_s_at
ras homolog gene family, member Q	RHOQ	Atrophy	0.811818	7.05921e-05	Hs.643481	212119_at
sorting nexin 3	SNX3	Atrophy	0.827638	6.75639e-05	Hs.12102	213545_x_at
Mindbomb homolog 1 (Drosophila)	MIB1	Atrophy	0.646358	7.86029e-06	Hs.658808	236573_at
mindbomb homolog 1 (Drosophila)	MIB1	Atrophy	0.655106	7.29155e-05	Hs.658808	1558645_at
protein phosphatase 1, regulatory (inhibitor) subunit 3C	PPP1R3C	Atrophy	0.592171	0.000159174	Hs.303090	240187_at
Ras association (RalGDS/AF-6) domain family 3	RASSF3	Atrophy	0.753398	4.11689e-06	Hs.655521	212870_at
transducin-like enhancer of split 6 (E(sp1) homolog, Drosophila)	TLE6	Atrophy	0.537538	4.09251e-06	Hs.334507	1553812_at
acidic (leucine-rich) nuclear phosphoprotein 32 family, member B	ANP32B	48H	1.19479	0.000105245	Hs.494604	201305_x_at
acidic (leucine-rich) nuclear phosphoprotein 32 family, member B	ANP32B	48H	1.23724	1.28e-05	Hs.494604	201306_s_at
additional sex combs like 1 (Drosophila)	ASXL1	48H	1.17104	0.000194019	Hs.374043	212237_at
B-cell translocation gene 1, anti-proliferative	BTG1	48H	1.30791	0.000367986	Hs.255935	200920_s_at
bladder cancer associated protein	BLCAP	48H	1.29941	8.52e-08	Hs.472651	201032_at
calmodulin 1 (phosphorylase kinase, delta)	CALM1	48H	1.36629	1.12e-08	Hs.282410	209563_x_at
calmodulin 1 (phosphorylase kinase, delta)	CALM1	48H	1.42143	1.03e-08	Hs.282410	200653_s_at
casein kinase 2, alpha prime polypeptide	CSNK2A2	48H	1.32022	0.000237653	Hs.82201	203575_at
CREB binding protein (Rubinstein-Taybi syndrome)	CREBBP	48H	1.25476	8.5e-05	Hs.459759	202160_at
cyclin G2	CCNG2	48H	1.4931	3.32e-06	Hs.13291	202770_s_at
cytoplasmic polyadenylation element binding protein 3	CPEB3	48H	1.2011	0.000179619	Hs.131683	205773_at
dual specificity phosphatase 22	DUSP22	48H	1.11206	0.00028304	Hs.29106	218845_at
GABA(A) receptor-associated protein like 1	GABARAPL1	48H	1.37803	1.07e-05	Hs.524250	208868_s_at
growth arrest and DNA-damage-inducible, alpha	GADD45A	48H	2.38374	4.38e-10	Hs.80409	203725_at
heat shock transcription factor 2	HSF2	48H	1.27566	0.000256689	Hs.158195	209657_s_at
histone deacetylase 4	HDAC4	48H	2.4399	2.89e-08	Hs.20516	204225_at
HMG-box transcription factor 1	HBP1	48H	1.33442	0.000388268	Hs.162032	209102_s_at
inhibitor of DNA binding 4, dominant negative helix-loop-helix protein	ID4	48H	1.46961	0.000430923	Hs.519601	209291_at
interleukin-1 receptor-associated kinase 2	IRAK2	48H	1.56357	2.86e-05	Hs.449207	231779_at
LIM domain 7	LMO7	48H	1.19561	0.000494134	Hs.207631	202674_s_at
microphthalmia-associated transcription factor	MITF	48H	1.13955	0.00034956	Hs.166017	207233_s_at
modulator of apoptosis 1	MOAP1	48H	1.19683	4.49e-05	Hs.24719	212508_at
multiple EGF-like-domains 10	MEGF10	48H	1.40715	0.000430313	Hs.438709	232523_at
PHD finger protein 1	PHF1	48H	1.22734	0.000259762	Hs.166204	40446_at
protein phosphatase methylesterase 1	PPME1	48H	1.17221	0.000135447	Hs.503251	49077_at
regulator of G-protein signalling 10	RGS10	48H	2.26375	3.45e-05	Hs.501200	204319_s_at
Rho-related BTB domain containing 1	RHOBTB1	48H	1.46515	5.61e-07	Hs.148670	212651_at
tankyrase, TRF1-interacting ankyrin-related ADP-ribose polymerase	TNKS	48H	1.29563	4.54e-07	Hs.370267	202561_at
transcriptional adaptor 2 (ADA2 homolog, yeast)-beta	MGC21874	48H	1.18689	5.96e-06	Hs.518614	226240_at
TSC22 domain family, member 1	TSC22D1	48H	1.30517	3.36e-05	Hs.507916	215111_s_at
TSC22 domain family, member 3	TSC22D3	48H	1.26668	2.09e-05	Hs.522074	208763_s_at
TSC22 domain family, member 3	TSC22D3	48H	1.36805	0.000418928	Hs.522074	207001_x_at
tumor protein p53 (Li-Fraumeni syndrome)	TP53	48H	1.97384	0.00032396	Hs.654481	211300_s_at
v-maf musculoaponeurotic fibrosarcoma oncogene homolog G (avian) /// similar to v-maf musculoaponeurotic fibrosarcoma oncogene family, protein G	LOC644132 /// MAFG	48H	1.41409	0.000346504	Hs.252229	204970_s_at
ataxin 1	ATXN1	48H	1.23595	2.08e-05	Hs.434961	203232_s_at
ataxin 1	ATXN1	48H	1.23755	0.000431188	Hs.434961	203231_s_at
calmodulin 1 (phosphorylase kinase, delta)	CALM1	48H	1.3048	2.75e-07	Hs.282410	200655_s_at
calmodulin 1 (phosphorylase kinase, delta)	CALM1	48H	1.43987	1.81e-08	Hs.282410	211984_at
calmodulin 1 (phosphorylase kinase, delta)	CALM1	48H	1.45373	6.79e-08	Hs.282410	211985_s_at
calmodulin 1 (phosphorylase kinase, delta)	CALM1	48H	1.80121	0.00010056	Hs.282410	241619_at
CDC42 effector protein (Rho GTPase binding) 3	CDC42EP3	48H	1.41399	7.69e-05	Hs.369574	209286_at
CDC42 effector protein (Rho GTPase binding) 3	CDC42EP3	48H	1.61624	8.14e-07	Hs.369574	209288_s_at
cylindromatosis (turban tumor syndrome)	CYLD	48H	1.2325	9.65e-07	Hs.578973	213295_at
eyes absent homolog 4 (Drosophila)	EYA4	48H	1.21428	0.000204243	Hs.661127	238877_at
eyes absent homolog 4 (Drosophila)	EYA4	48H	1.25728	0.00015754	Hs.661127	207327_at
headcase homolog (Drosophila)	HECA	48H	1.17974	0.000109699	Hs.197644	218603_at
histone deacetylase 4	HDAC4	48H	2.54472	1.83e-08	Hs.20516	228813_at
jumonji C domain-containing histone demethylase 1 homolog D (S. cerevisiae)	JHDM1D	48H	1.33606	8.95e-05	Hs.308710	221778_at
jumonji domain containing 1B	JMJD1B	48H	1.18156	0.000383229	Hs.483486	210878_s_at
Junction-mediating and regulatory protein	JMY	48H	1.2849	0.000210301	Hs.482605	226352_at
leucine zipper, putative tumor suppressor 1	LZTS1	48H	1.65726	0.000186181	Hs.521432	219042_at
MAX interactor 1	MXI1	48H	1.26255	2.99e-05	---	202364_at
meningioma expressed antigen 5 (hyaluronidase)	MGEA5	48H	1.22243	0.000391188	Hs.500842	200899_s_at
myeloid/lymphoid or mixed-lineage leukemia 3	MLL3	48H	1.20323	0.000255099	Hs.647120	222415_at
phosphodiesterase 11A	PDE11A	48H	1.62757	6.46e-05	Hs.570273	237248_at
phosphoinositide-3-kinase, regulatory subunit 1 (p85 alpha)	PIK3R1	48H	1.27361	1.53e-05	Hs.132225	212239_at
polyhomeotic homolog 3 (Drosophila)	PHC3	48H	1.1162	4.07e-05	Hs.529592	226508_at
protein kinase, AMP-activated, beta 1 non-catalytic subunit	PRKAB1	48H	1.52325	0.000266348	Hs.6061	201834_at
rapamycin-insensitive companion of mTOR	RICTOR	48H	1.39513	0.000157029	Hs.407926	226312_at
ras homolog gene family, member B	RHOB	48H	1.6441	0.000303807	Hs.502876	1553962_s_at
ras homolog gene family, member B	RHOB	48H	1.73661	7.33e-07	Hs.502876	212099_at
SH3-domain binding protein 5 (BTK-associated)	SH3BP5	48H	1.30341	0.000366479	Hs.257761	201811_x_at
SH3-domain GRB2-like endophilin B1	SH3GLB1	48H	1.07758	0.000351875	Hs.136309	209091_s_at
Sp1 transcription factor	SP1	48H	1.17819	0.000172213	Hs.649191	224760_at
TATA element modulatory factor 1	TMF1	48H	1.31357	0.000197564	Hs.267632	214948_s_at
tripartite motif-containing 28	TRIM28	48H	1.18827	0.000478818	Hs.467408	200990_at
tumor protein p73-like	TP73L	48H	1.31799	0.000221387	Hs.137569	209863_s_at
tumor protein p73-like	TP73L	48H	1.41052	0.000162874	Hs.137569	207382_at
WNT1 inducible signaling pathway protein 2	WISP2	48H	1.64583	0.000212665	Hs.592145	205792_at
aristaless related homeobox	ARX	48H	0.752968	0.000141644	Hs.300304	238878_at
ASF1 anti-silencing function 1 homolog A (S. cerevisiae)	ASF1A	48H	0.814489	0.00038276	Hs.292316	203427_at
CAMP-binding guanine nucleotide exchange factor IV (cAMP-GEFIV) mRNA, clone W15, partial sequence	---	48H	0.752417	3.1e-05	Hs.594083	230739_at
cyclin D1	CCND1	48H	0.546157	0.000375698	Hs.523852	208711_s_at
homolog of rat pragma of Rnd2	DKFZp761P0423	48H	0.798288	0.000220709	Hs.657673	235085_at
Mitogen-activated protein kinase kinase 3	MAP2K3	48H	0.849716	0.000140329	Hs.514012	215499_at
mutL homolog 1, colon cancer, nonpolyposis type 2 (E. coli)	MLH1	48H	0.858457	1.11e-05	Hs.195364	202520_s_at
protein phosphatase 1, regulatory (inhibitor) subunit 3A (glycogen and sarcoplasmic reticulum binding subunit, skeletal muscle)	PPP1R3A	48H	0.809729	1.4e-05	Hs.458309	206895_at
protein phosphatase 2C, magnesium-dependent, catalytic subunit	PPM2C	48H	0.641456	7.79e-07	Hs.22265	218273_s_at
PTC7 protein phosphatase homolog (S. cerevisiae)	PPTC7	48H	0.633537	2.55e-05	Hs.13854	235744_at
PTC7 protein phosphatase homolog (S. cerevisiae)	PPTC7	48H	0.720346	0.000184842	Hs.13854	225213_at
ras homolog gene family, member Q	RHOQ	48H	0.86247	0.00018367	Hs.643481	212117_at
Ras-associated protein Rap1	RBJ	48H	0.82539	0.000405753	Hs.434993	227859_at
regulator of G-protein signalling 3	RGS3	48H	0.621179	2.48e-08	Hs.494875	203823_at
SH3-binding domain kinase 1	SBK1	48H	0.69274	5.94e-05	Hs.97837	226549_at
basic helix-loop-helix domain containing, class B, 3	BHLHB3	48H	0.738171	0.000109539	Hs.177841	223185_s_at
CAMP-binding guanine nucleotide exchange factor IV (cAMP-GEFIV) mRNA, clone W15, partial sequence	---	48H	0.710335	3.88e-05	Hs.594083	242149_at
Homeodomain interacting protein kinase 2	HIPK2	48H	0.809875	4.92e-05	Hs.397465	225116_at
Homeodomain interacting protein kinase 2	HIPK2	48H	0.850067	4.93e-05	Hs.397465	225368_at
jun D proto-oncogene	JUND	48H	0.784241	9.54e-05	Hs.2780	203752_s_at
large subunit GTPase 1 homolog (S. cerevisiae)	LSG1	48H	0.78749	0.00046893	Hs.518505	223200_s_at
leucine rich repeat containing 39	LRRC39	48H	0.720337	0.00045158	Hs.44277	1559580_at
nephroblastoma overexpressed gene	NOV	48H	0.415921	0.000419917	Hs.235935	214321_at
Nitric oxide synthase 1 (neuronal)	NOS1	48H	0.614619	1.12e-06	Hs.654410	239132_at
peroxisome proliferator-activated receptor alpha	PPARA	48H	0.82202	0.000307406	Hs.103110	206870_at
peroxisome proliferator-activated receptor gamma, coactivator 1 alpha	PPARGC1A	48H	0.713484	4.56e-07	Hs.527078	219195_at
protein kinase C and casein kinase substrate in neurons 3	PACSIN3	48H	0.758331	0.000431705	Hs.334639	218744_s_at
protein phosphatase 2 (formerly 2A), regulatory subunit B'', alpha	PPP2R3A	48H	0.733167	1.99e-05	Hs.518155	207749_s_at
protein phosphatase 2A activator, regulatory subunit 4	PPP2R4	48H	0.708317	0.00023481	Hs.400740	216105_x_at
protein tyrosine phosphatase type IVA, member 3	PTP4A3	48H	0.683678	2.77e-06	Hs.43666	206574_s_at
protein tyrosine phosphatase, non-receptor type 3	PTPN3	48H	0.701105	1.32e-05	Hs.436429	203997_at
quaking homolog, KH domain RNA binding (mouse)	QKI	48H	0.849483	0.000398519	Hs.510324	212636_at
Rac/Cdc42 guanine nucleotide exchange factor (GEF) 6	ARHGEF6	48H	0.846655	5.94e-05	Hs.522795	209539_at
Ras-related GTP binding D	RRAGD	48H	0.84314	6.91e-06	Hs.485938	221523_s_at
serum response factor (c-fos serum response element-binding transcription factor)	SRF	48H	0.801815	0.000150917	Hs.520140	202401_s_at
serum/glucocorticoid regulated kinase	SGK	48H	0.585413	9.73e-06	Hs.510078	201739_at
signal transducer and activator of transcription 3 (acute-phase response factor)	STAT3	48H	0.85697	0.000390944	Hs.463059	208991_at
sterile alpha motif and leucine zipper containing kinase AZK	ZAK	48H	0.780319	0.000484628	Hs.444451	238613_at
TEA domain family member 1 (SV40 transcriptional enhancer factor)	TEAD1	48H	0.853448	7.41e-05	Hs.655331	224955_at
tumor protein p53 inducible nuclear protein 2	TP53INP2	48H	0.577603	7.49e-09	Hs.516994	224836_at
adaptor protein, phosphotyrosine interaction, PH domain and leucine zipper containing 1	APPL1	48H	0.709109	4.94e-06	Hs.476415	222538_s_at
adaptor protein, phosphotyrosine interaction, PH domain and leucine zipper containing 1	APPL1	48H	0.797963	2.24e-05	Hs.476415	218158_s_at
basic helix-loop-helix domain containing, class B, 3	BHLHB3	48H	0.67321	3.08e-06	Hs.177841	221530_s_at
calcium/calmodulin-dependent protein kinase (CaM kinase) II alpha	CAMK2A	48H	0.723534	0.00051543	Hs.143535	213108_at
docking protein 5	DOK5	48H	0.656822	0.000132128	Hs.656582	1554863_s_at
docking protein 5	DOK5	48H	0.743179	1.76e-06	Hs.656582	214844_s_at
dual specificity phosphatase 10	DUSP10	48H	0.684502	0.000163858	Hs.497822	221563_at
dual specificity phosphatase 10	DUSP10	48H	0.709566	6.41e-05	Hs.497822	215501_s_at
HD domain containing 2	HDDC2	48H	0.857223	1.1e-06	Hs.32826	203259_s_at
leucine rich repeat (in FLII) interacting protein 1	LRRFIP1	48H	0.80923	2.23e-05	Hs.471779	223492_s_at
myeloid leukemia factor 1	MLF1	48H	0.801496	0.000275576	Hs.85195	204784_s_at
neuroblastoma RAS viral (v-ras) oncogene homolog	NRAS	48H	0.808816	0.000236888	Hs.486502	202647_s_at
Neuropeptide Y receptor Y6 (pseudogene)	NPY6R	48H	0.704702	4.44e-06	Hs.660879	236860_at
nuclear receptor subfamily 4, group A, member 1	NR4A1	48H	0.717314	0.000143133	Hs.524430	202340_x_at
pre-B-cell colony enhancing factor 1	PBEF1	48H	0.817156	7.71e-05	Hs.489615	217738_at
protein phosphatase 2 (formerly 2A), regulatory subunit B'', alpha	PPP2R3A	48H	0.716025	1.59e-06	Hs.518155	209632_at
protein phosphatase 2 (formerly 2A), regulatory subunit B'', alpha	PPP2R3A	48H	0.724942	1.11e-06	Hs.518155	209633_at
protein phosphatase 2, regulatory subunit B', epsilon isoform	PPP2R5E	48H	0.85497	6.23e-06	Hs.334868	203338_at
protein phosphatase 2A activator, regulatory subunit 4	PPP2R4	48H	0.67018	4.11e-06	Hs.400740	206452_x_at
protein phosphatase 2A activator, regulatory subunit 4	PPP2R4	48H	0.732589	0.000136348	Hs.400740	208874_x_at
protein phosphatase 2C, magnesium-dependent, catalytic subunit	PPM2C	48H	0.664451	1.18e-05	Hs.22265	222572_at
protein tyrosine phosphatase type IVA, member 3	PTP4A3	48H	0.737024	8.89e-07	Hs.43666	209695_at
RAD1 homolog (S. pombe)	RAD1	48H	0.833931	3.61e-05	Hs.531879	210216_x_at
sarcospan (Kras oncogene-associated gene)	SSPN	48H	0.811715	0.000116273	Hs.183428	204963_at
SH3-binding domain kinase 1	SBK1	48H	0.658881	1.53e-05	Hs.97837	226548_at
snail homolog 3 (Drosophila)	SNAI3	48H	0.484531	5.53e-05	Hs.673548	1560228_at
transducer of ERBB2, 1	TOB1	48H	0.735558	1.87e-05	Hs.653129	202704_at
A kinase (PRKA) anchor protein (gravin) 12	AKAP12	14D	1.72584	0.00197035	Hs.371240	227530_at
A kinase (PRKA) anchor protein 11	AKAP11	14D	1.34222	1.51194e-06	Hs.105105	203156_at
Abelson helper integration site 1	AHI1	14D	1.14191	0.00159824	Hs.386684	221569_at
ABI gene family, member 3 (NESH) binding protein	ABI3BP	14D	1.42463	0.00212088	Hs.477015	223395_at
abl-interactor 1	ABI1	14D	1.12317	0.000109915	Hs.508148	209027_s_at
acidic (leucine-rich) nuclear phosphoprotein 32 family, member B	ANP32B	14D	1.24543	0.00165382	Hs.494604	201306_s_at
activating transcription factor 4 (tax-responsive enhancer element B67)	ATF4	14D	0.770172	1.63464e-05	Hs.496487	200779_at
activating transcription factor 7	ATF7	14D	0.795278	0.000510136	Hs.12286	228830_s_at
activating transcription factor 7 interacting protein	ATF7IP	14D	1.21792	0.000847868	Hs.591151	218987_at
adaptor protein, phosphotyrosine interaction, PH domain and leucine zipper containing 1	APPL1	14D	0.669499	1.89528e-05	Hs.476415	222538_s_at
adaptor protein, phosphotyrosine interaction, PH domain and leucine zipper containing 1	APPL1	14D	0.694325	3.83131e-06	Hs.476415	218158_s_at
adenomatosis polyposis coli down-regulated 1	APCDD1	14D	0.707547	0.00159506	Hs.293274	225016_at
ADP-ribosylation factor guanine nucleotide-exchange factor 1(brefeldin A-inhibited)	ARFGEF1	14D	1.18186	0.000523498	Hs.656902	216266_s_at
ADP-ribosylation factor-like 6 interacting protein 2	ARL6IP2	14D	1.21509	2.35316e-06	Hs.190440	222700_at
ADP-ribosylation-like factor 6 interacting protein 4	ARL6IP4	14D	0.903721	0.0022058	Hs.103561	218216_x_at
AE binding protein 2	AEBP2	14D	1.22171	0.00022296	Hs.126497	225889_at
alpha-kinase 3	ALPK3	14D	0.70452	6.42726e-06	Hs.459183	214846_s_at
alpha-kinase 3	ALPK3	14D	0.787405	0.000148489	Hs.459183	228342_s_at
amino-terminal enhancer of split	AES	14D	0.837415	0.00123285	Hs.515053	217729_s_at
ankyrin repeat domain 1 (cardiac muscle)	ANKRD1	14D	3.15622	6.79354e-07	Hs.448589	206029_at
annexin A11	ANXA11	14D	0.828253	0.000172286	Hs.530291	214783_s_at
annexin A2	ANXA2	14D	1.25765	0.000508143	Hs.511605	201590_x_at
annexin A2	ANXA2	14D	1.31612	0.000575689	Hs.511605	213503_x_at
annexin A2	ANXA2	14D	1.3226	9.00025e-05	Hs.511605	210427_x_at
annexin A7	ANXA7	14D	1.14141	0.00130686	Hs.631827	201366_at
annexin A7	ANXA7	14D	1.1457	0.0022747	Hs.631827	209860_s_at
AP2 associated kinase 1	AAK1	14D	1.15644	0.000225967	Hs.658749	225522_at
apoptosis, caspase activation inhibitor	AVEN	14D	1.27696	0.00187105	Hs.555966	219366_at
armadillo repeat containing, X-linked 2	ARMCX2	14D	1.32681	0.000160502	Hs.48924	203404_at
aryl hydrocarbon receptor nuclear translocator	ARNT	14D	1.85112	0.0001116	Hs.632446	218222_x_at
aurora kinase A interacting protein 1 /// similar to Cyclin-L2 (Paneth cell-enhanced expression protein)	AURKAIP1 /// LOC727877	14D	0.862163	2.17294e-05	Hs.632515	225552_x_at
aurora kinase A interacting protein 1 /// similar to Cyclin-L2 (Paneth cell-enhanced expression protein)	AURKAIP1 /// LOC727877	14D	0.871265	0.00067154	Hs.632515	218580_x_at
B-cell translocation gene 1, anti-proliferative	BTG1	14D	1.28959	0.000600566	Hs.255935	200920_s_at
B-cell translocation gene 1, anti-proliferative	BTG1	14D	1.34156	0.000113417	Hs.255935	200921_s_at
basic helix-loop-helix domain containing, class B, 3	BHLHB3	14D	0.730247	1.8148e-05	Hs.177841	223185_s_at
basic helix-loop-helix domain containing, class B, 3	BHLHB3	14D	0.755901	0.00045046	Hs.177841	221530_s_at
basic leucine zipper nuclear factor 1 (JEM-1)	BLZF1	14D	1.33972	8.36381e-06	Hs.130746	203840_at
BCL2/adenovirus E1B 19kDa interacting protein 3-like	BNIP3L	14D	1.21464	0.0016727	Hs.131226	221479_s_at
BCL2/adenovirus E1B 19kDa interacting protein 3-like	BNIP3L	14D	1.3236	1.05428e-05	Hs.131226	221478_at
bladder cancer associated protein	BLCAP	14D	1.37759	1.62814e-05	Hs.472651	201032_at
bridging integrator 1	BIN1	14D	0.908883	0.00108238	Hs.193163	214439_x_at
bridging integrator 1	BIN1	14D	0.908965	0.00125832	Hs.193163	210202_s_at
bridging integrator 1	BIN1	14D	0.91538	0.000801885	Hs.193163	210201_x_at
bromodomain and PHD finger containing, 3	BRPF3	14D	1.31182	0.000292444	Hs.520096	225217_s_at
bromodomain containing 7	BRD7	14D	1.13914	0.00275493	Hs.437894	221776_s_at
bromodomain PHD finger transcription factor	BPTF	14D	1.13424	3.9975e-05	Hs.444200	232909_s_at
BTB and CNC homology 1, basic leucine zipper transcription factor 2	BACH2	14D	1.36832	0.00191905	Hs.269764	236796_at
c-myc binding protein	MYCBP	14D	1.42413	5.63167e-06	Hs.591506	203359_s_at
c-myc binding protein	MYCBP	14D	1.64423	0.000390966	Hs.591506	203360_s_at
calmodulin 1 (phosphorylase kinase, delta)	CALM1	14D	1.34835	2.7073e-06	Hs.282410	209563_x_at
calmodulin 1 (phosphorylase kinase, delta)	CALM1	14D	1.35315	1.39029e-08	Hs.282410	200655_s_at
calmodulin 1 (phosphorylase kinase, delta)	CALM1	14D	1.44126	5.88876e-08	Hs.282410	200653_s_at
calmodulin 1 (phosphorylase kinase, delta)	CALM1	14D	1.4844	2.57143e-08	Hs.282410	211984_at
calmodulin 1 (phosphorylase kinase, delta)	CALM1	14D	1.57649	4.30617e-09	Hs.282410	211985_s_at
calmodulin 1 (phosphorylase kinase, delta)	CALM1	14D	1.8308	8.92063e-07	Hs.282410	241619_at
calmodulin binding transcription activator 1	CAMTA1	14D	0.844349	1.11598e-05	Hs.397705	225692_at
calmodulin binding transcription activator 1	CAMTA1	14D	0.848946	1.50237e-05	Hs.397705	225693_s_at
calmodulin-like 4	CALML4	14D	2.80334	6.04017e-05	Hs.584921	221879_at
CAMP-binding guanine nucleotide exchange factor IV (cAMP-GEFIV) mRNA, clone W15, partial sequence	---	14D	0.710892	6.69965e-07	Hs.594083	230739_at
CAMP-binding guanine nucleotide exchange factor IV (cAMP-GEFIV) mRNA, clone W15, partial sequence	---	14D	0.720065	2.04397e-05	Hs.594083	242149_at
caprin family member 2	CAPRIN2	14D	1.36193	7.99189e-06	Hs.234355	218456_at
CASP8 associated protein 2	CASP8AP2	14D	1.1968	0.00135916	Hs.558218	222201_s_at
Cbp/p300-interacting transactivator, with Glu/Asp-rich carboxy-terminal domain, 4	CITED4	14D	0.736693	7.10068e-05	Hs.355820	228625_at
CCAAT/enhancer binding protein (C/EBP), gamma	CEBPG	14D	0.800904	0.00198199	Hs.429666	204203_at
CCAAT/enhancer binding protein (C/EBP), gamma	CEBPG	14D	0.831115	0.000487592	Hs.429666	225527_at
CDC-like kinase 4	CLK4	14D	1.19971	9.37217e-05	Hs.406557	210346_s_at
CDC42 effector protein (Rho GTPase binding) 3	CDC42EP3	14D	1.53532	1.7123e-08	Hs.369574	209286_at
CDC42 effector protein (Rho GTPase binding) 3	CDC42EP3	14D	1.5376	0.000192781	Hs.369574	209287_s_at
CDC42 effector protein (Rho GTPase binding) 3	CDC42EP3	14D	1.69252	1.48344e-11	Hs.369574	209288_s_at
CDC42 effector protein (Rho GTPase binding) 4	CDC42EP4	14D	0.79706	0.000401567	Hs.176479	214721_x_at
CDK5 regulatory subunit associated protein 2	CDK5RAP2	14D	1.20907	0.000492702	Hs.269560	233540_s_at
CDK5 regulatory subunit associated protein 2	CDK5RAP2	14D	1.41456	0.00052333	Hs.269560	220935_s_at
CDK5 regulatory subunit associated protein 3	CDK5RAP3	14D	1.15967	0.00099926	Hs.20157	218740_s_at
cell cycle associated protein 1	CAPRIN1	14D	1.14993	0.000488232	Hs.471818	200723_s_at
cell cycle associated protein 1	CAPRIN1	14D	1.27846	0.000348632	Hs.471818	226289_at
cell cycle progression 1	CCPG1	14D	1.34188	0.000624157	Hs.612814	214151_s_at
cell cycle progression 1	CCPG1	14D	1.34204	0.00135243	Hs.612814	214152_at
cell cycle progression 1	CCPG1	14D	1.34245	0.000152095	Hs.612814	221511_x_at
cell cycle progression 1	CCPG1	14D	1.68214	9.29845e-07	Hs.612814	222156_x_at
cell division cycle 2-like 1 (PITSLRE proteins) /// cell division cycle 2-like 2 (PITSLRE proteins)	CDC2L1 /// CDC2L2	14D	1.51413	7.18898e-06	Hs.654369	211289_x_at
cell division cycle 2-like 1 (PITSLRE proteins) /// cell division cycle 2-like 2 (PITSLRE proteins) /// similar to cell division cycle 2-like 1 (PITSLRE proteins) isoform 1	CDC2L1 /// CDC2L2 /// LOC728642	14D	1.3906	0.000129183	Hs.654369	215329_s_at
cell division cycle 2-like 2 (PITSLRE proteins) /// similar to cell division cycle 2-like 1 (PITSLRE proteins) isoform 1	CDC2L2 /// LOC728642	14D	1.23407	5.59534e-05	Hs.651228	212401_s_at
cellular repressor of E1A-stimulated genes 1	CREG1	14D	1.31338	1.73365e-05	Hs.5710	201200_at
clock homolog (mouse)	CLOCK	14D	1.21772	1.87573e-05	Hs.436975	204980_at
clusterin associated protein 1	CLUAP1	14D	1.18855	0.00219668	Hs.155995	204576_s_at
Cofactor required for Sp1 transcriptional activation, subunit 7, 70kDa	CRSP7	14D	1.93419	0.00109166	Hs.356467	1559382_at
cold inducible RNA binding protein	CIRBP	14D	1.31538	0.00259987	Hs.634522	225191_at
core-binding factor, beta subunit	CBFB	14D	1.28443	0.00059872	Hs.460988	202370_s_at
CREB binding protein (Rubinstein-Taybi syndrome)	CREBBP	14D	1.19553	1.27696e-05	Hs.459759	202160_at
CREB/ATF bZIP transcription factor	CREBZF	14D	1.2207	0.000260798	Hs.535319	202979_s_at
cullin 7	CUL7	14D	1.1621	0.00220474	Hs.520136	36084_at
CXXC finger 1 (PHD domain)	CXXC1	14D	1.12505	0.000259285	Hs.180933	48580_at
cyclic AMP phosphoprotein, 19 kD	ARPP-19	14D	1.12898	0.00127849	Hs.512908	221483_s_at
cyclic AMP phosphoprotein, 19 kD	ARPP-19	14D	1.21824	0.00274206	Hs.512908	214553_s_at
cyclic AMP phosphoprotein, 19 kD	ARPP-19	14D	1.22013	0.000734838	Hs.512908	221482_s_at
cyclin B1	CCNB1	14D	1.93934	0.000222261	Hs.23960	214710_s_at
cyclin B1 interacting protein 1	CCNB1IP1	14D	0.75321	6.39344e-06	Hs.107003	217988_at
cyclin C	CCNC	14D	1.10515	0.00233255	Hs.430646	201955_at
cyclin D-type binding-protein 1	CCNDBP1	14D	1.23577	0.000158302	Hs.36794	223084_s_at
cyclin F	CCNF	14D	0.790135	0.001887	Hs.1973	204826_at
cyclin G1	CCNG1	14D	0.743648	0.00188777	Hs.79101	208796_s_at
cyclin G2	CCNG2	14D	1.97355	1.09837e-05	Hs.13291	202769_at
cyclin G2	CCNG2	14D	2.20733	5.51533e-06	Hs.13291	202770_s_at
cyclin G2	CCNG2	14D	2.24415	2.5181e-08	Hs.13291	211559_s_at
cyclin L1	CCNL1	14D	1.19212	0.00116387	Hs.4859	1555411_a_at
Cyclin L2	CCNL2	14D	0.800088	0.00143333	Hs.515704	225555_x_at
cyclin L2 /// similar to Cyclin-L2 (Paneth cell-enhanced expression protein)	CCNL2 /// LOC727877	14D	1.25113	0.00020234	Hs.515704	222999_s_at
cyclin L2 /// similar to Cyclin-L2 (Paneth cell-enhanced expression protein)	CCNL2 /// LOC727877	14D	2.1212	1.12222e-05	Hs.515704	221427_s_at
cyclin M4	CNNM4	14D	0.712503	0.000192982	Hs.656229	218900_at
Cyclin-dependent kinase 6	CDK6	14D	0.569602	0.00250305	Hs.119882	231198_at
cyclin-dependent kinase inhibitor 2B (p15, inhibits CDK4)	CDKN2B	14D	2.21776	0.000451074	Hs.72901	236313_at
cylindromatosis (turban tumor syndrome)	CYLD	14D	1.25648	0.00189457	Hs.578973	39582_at
cylindromatosis (turban tumor syndrome)	CYLD	14D	1.30757	3.54102e-05	Hs.578973	213295_at
cylindromatosis (turban tumor syndrome)	CYLD	14D	1.44206	0.000662458	Hs.578973	221903_s_at
cylindromatosis (turban tumor syndrome)	CYLD	14D	2.01347	0.00189734	Hs.578973	222142_at
cysteine-rich PAK1 inhibitor	CRIPAK	14D	1.33005	4.94583e-06	Hs.26410	228318_s_at
cysteine-rich PAK1 inhibitor	CRIPAK	14D	1.37103	0.000359962	Hs.26410	241408_at
cysteine-rich with EGF-like domains 1	CRELD1	14D	1.19292	0.00115755	Hs.9383	203368_at
cytokine induced apoptosis inhibitor 1	CIAPIN1	14D	0.845161	0.00102256	Hs.4900	208968_s_at
cytoplasmic FMR1 interacting protein 1	CYFIP1	14D	1.1432	0.00210783	Hs.26704	208923_at
D4, zinc and double PHD fingers family 2	DPF2	14D	1.53113	0.0010079	Hs.13495	202116_at
DCN1, defective in cullin neddylation 1, domain containing 1 (S. cerevisiae)	DCUN1D1	14D	1.31112	0.00171873	Hs.104613	222679_s_at
DCN1, defective in cullin neddylation 1, domain containing 4 (S. cerevisiae)	DCUN1D4	14D	1.20977	0.00122919	Hs.605388	212851_at
DCN1, defective in cullin neddylation 1, domain containing 4 (S. cerevisiae)	DCUN1D4	14D	1.48426	0.000575111	Hs.605388	212853_at
DCN1, defective in cullin neddylation 1, domain containing 5 (S. cerevisiae)	DCUN1D5	14D	0.872023	0.000176727	Hs.503716	223151_at
dedicator of cytokinesis 7	DOCK7	14D	1.16613	0.000114194	Hs.538059	225384_at
developmentally regulated GTP binding protein 2	DRG2	14D	2.29762	2.34148e-07	Hs.78582	203267_s_at
disabled homolog 2, mitogen-responsive phosphoprotein (Drosophila)	DAB2	14D	1.38653	0.000305603	Hs.481980	232898_at
disabled homolog 2, mitogen-responsive phosphoprotein (Drosophila)	DAB2	14D	1.39446	0.00113479	Hs.481980	201280_s_at
discs, large homolog 5 (Drosophila)	DLG5	14D	1.25578	0.00056842	Hs.654780	201681_s_at
docking protein 5	DOK5	14D	0.682045	8.31347e-06	Hs.656582	1554863_s_at
docking protein 5	DOK5	14D	0.762047	2.49085e-06	Hs.656582	214844_s_at
docking protein 7	DOK7	14D	0.804568	0.00238612	Hs.122110	240633_at
dual specificity phosphatase 13	DUSP13	14D	0.820941	5.47377e-05	Hs.178170	219963_at
dual specificity phosphatase 22	DUSP22	14D	1.11504	0.00112034	Hs.29106	218845_at
dual specificity phosphatase 28	DUSP28	14D	0.763841	0.000317515	Hs.369297	229211_at
dullard homolog (Xenopus laevis)	DULLARD	14D	0.654962	8.79802e-05	Hs.513913	200035_at
enhancer of polycomb homolog 1 (Drosophila)	EPC1	14D	1.11301	0.00193972	Hs.167805	234969_s_at
epidermal growth factor receptor pathway substrate 8	EPS8	14D	1.19461	0.00032769	Hs.591160	202609_at
ERBB receptor feedback inhibitor 1	ERRFI1	14D	1.4367	7.42828e-05	Hs.605445	224657_at
erbb2 interacting protein	ERBB2IP	14D	1.12823	0.0027532	Hs.591774	222473_s_at
erbb2 interacting protein	ERBB2IP	14D	1.17434	0.000463923	Hs.591774	217941_s_at
esterase D/formylglutathione hydrolase	ESD	14D	0.929736	0.00140523	Hs.432491	209009_at
estrogen receptor 1	ESR1	14D	0.859157	0.00241673	Hs.208124	205225_at
estrogen receptor binding site associated, antigen, 9	EBAG9	14D	0.876489	0.00164788	Hs.409368	204278_s_at
estrogen-related receptor alpha	ESRRA	14D	0.761576	5.84689e-09	Hs.110849	1487_at
exportin 1 (CRM1 homolog, yeast)	XPO1	14D	1.18228	9.06297e-05	Hs.370770	208775_at
exportin 4	XPO4	14D	0.780997	0.000626475	Hs.507452	222649_at
farnesyltransferase, CAAX box, beta	FNTB	14D	1.18215	5.48374e-05	Hs.632345	225851_at
farnesyltransferase, CAAX box, beta	FNTB	14D	1.33632	0.001681	Hs.632345	1773_at
Fas (TNFRSF6) associated factor 1	FAF1	14D	0.896593	4.85812e-06	Hs.530402	218080_x_at
Fas-activated serine/threonine kinase	FASTK	14D	0.83339	0.000941982	Hs.647094	202676_x_at
Fas-activated serine/threonine kinase	FASTK	14D	0.84488	0.000130233	Hs.647094	214114_x_at
FAST kinase domains 1	FASTKD1	14D	0.728101	0.00186212	Hs.529276	219002_at
FAST kinase domains 2	FASTKD2	14D	0.861726	0.000404758	Hs.84429	216996_s_at
FAST kinase domains 5	FASTKD5	14D	0.85305	0.00131027	---	219016_at
FAT tumor suppressor homolog 4 (Drosophila)	FAT4	14D	1.21902	0.000677913	Hs.656574	219427_at
fem-1 homolog b (C. elegans)	FEM1B	14D	1.14788	0.0016247	Hs.362733	212367_at
FLYWCH-type zinc finger 1	FLYWCH1	14D	1.3954	3.64656e-05	Hs.655321	223950_s_at
Fms-related tyrosine kinase 1 (vascular endothelial growth factor/vascular permeability factor receptor)	FLT1	14D	0.846199	0.00128777	Hs.654360	222033_s_at
forkhead box P1	FOXP1	14D	1.69993	0.000807607	Hs.431498	1558996_at
formin-like 2	FMNL2	14D	1.30912	1.41881e-05	Hs.654630	226184_at
frequently rearranged in advanced T-cell lymphomas	FRAT1	14D	0.799409	0.00234998	Hs.126057	219889_at
frequently rearranged in advanced T-cell lymphomas 2	FRAT2	14D	0.7355	1.11289e-06	Hs.140720	209864_at
GATA binding protein 6	GATA6	14D	0.615942	0.00196433	Hs.514746	210002_at
GCN5 general control of amino-acid synthesis 5-like 2 (yeast)	GCN5L2	14D	1.23084	0.00243221	Hs.463045	202182_at
GDP dissociation inhibitor 2	GDI2	14D	1.22324	0.000186081	Hs.299055	200008_s_at
general transcription factor II, i /// general transcription factor II, i, pseudogene 1 /// similar to general transcription factor II, i isoform 1	GTF2I /// GTF2IP1 /// LOC732437	14D	1.13909	0.000368461	Hs.647041	210891_s_at
general transcription factor II, i /// general transcription factor II, i, pseudogene 1 /// similar to general transcription factor II, i isoform 1	GTF2I /// GTF2IP1 /// LOC732437	14D	1.24119	2.70788e-07	Hs.647041	201065_s_at
glucocorticoid receptor DNA binding factor 1	GRLF1	14D	0.826249	0.000513467	Hs.509447	229394_s_at
glutamate receptor interacting protein 2	GRIP2	14D	0.772971	0.00264214	Hs.517819	216481_at
growth arrest and DNA-damage-inducible, alpha	GADD45A	14D	2.42508	9.59764e-07	Hs.80409	203725_at
guanine nucleotide binding protein (G protein), alpha 11 (Gq class)	GNA11	14D	0.873158	0.00102758	Hs.655202	40562_at
Guanine nucleotide binding protein (G protein), alpha 11 (Gq class)	GNA11	14D	0.895477	0.000706653	Hs.654784	213944_x_at
guanine nucleotide binding protein (G protein), alpha inhibiting activity polypeptide 1	GNAI1	14D	1.2412	0.000256456	Hs.134587	209576_at
guanine nucleotide binding protein (G protein), beta polypeptide 1	GNB1	14D	1.09291	0.00240769	Hs.430425	200746_s_at
guanine nucleotide binding protein (G protein), gamma 5	GNG5	14D	0.801012	5.14897e-06	Hs.645427	207157_s_at
hairy/enhancer-of-split related with YRPW motif 2	HEY2	14D	0.789701	7.42658e-05	Hs.144287	219743_at
HD domain containing 2	HDDC2	14D	0.839238	3.4972e-10	Hs.32826	203259_s_at
headcase homolog (Drosophila)	HECA	14D	1.22218	7.63787e-06	Hs.197644	218603_at
hexamethylene bis-acetamide inducible 1	HEXIM1	14D	1.31425	1.41642e-05	Hs.15299	202814_s_at
HIV-1 Tat interactive protein 2, 30kDa	HTATIP2	14D	1.37327	0.000201085	Hs.90753	209448_at
HIV-1 Tat specific factor 1	HTATSF1	14D	1.13419	0.00113387	Hs.204475	202602_s_at
homeobox A10	HOXA10	14D	0.821811	0.00022154	Hs.592166	213150_at
homeobox A10	HOXA10	14D	0.832631	0.000108508	Hs.592166	213147_at
homeobox A5	HOXA5	14D	0.821784	0.000398008	Hs.655218	213844_at
homeobox B2	HOXB2	14D	0.816555	0.000635835	Hs.514289	205453_at
homeobox containing 1	HMBOX1	14D	1.22179	0.000785616	Hs.591836	219269_at
homeobox D10	HOXD10	14D	0.730473	0.000186901	Hs.123070	207373_at
Homeodomain interacting protein kinase 2	HIPK2	14D	0.756772	1.52575e-05	Hs.397465	225116_at
Homeodomain interacting protein kinase 2	HIPK2	14D	0.801121	0.000229899	Hs.397465	225368_at
homeodomain-only protein	HOP	14D	0.621672	0.00119485	Hs.654864	1566140_at
homer homolog 2 (Drosophila)	HOMER2	14D	0.750209	9.07853e-05	Hs.578443	217080_s_at
HRAS-like suppressor 3	HRASLS3	14D	0.861975	0.000743565	Hs.502775	209581_at
importin 9	IPO9	14D	1.16583	0.000264351	Hs.596014	217885_at
inhibitor of DNA binding 1, dominant negative helix-loop-helix protein	ID1	14D	0.6785	0.000262024	Hs.504609	208937_s_at
inhibitor of growth family, member 3	ING3	14D	1.16888	0.00275926	Hs.489811	205070_at
inositol hexaphosphate kinase 2	IHPK2	14D	1.59231	0.00122698	Hs.595983	223165_s_at
interferon-related developmental regulator 2	IFRD2	14D	0.849309	0.00253264	Hs.315177	209100_at
jumonji C domain-containing histone demethylase 1 homolog D (S. cerevisiae)	JHDM1D	14D	1.34733	0.00047173	Hs.308710	221778_at
jumonji domain containing 1B	JMJD1B	14D	1.16041	8.72217e-05	Hs.483486	201643_x_at
jumonji domain containing 1B	JMJD1B	14D	1.25041	3.8771e-06	Hs.483486	210878_s_at
jumonji domain containing 1C	JMJD1C	14D	1.29169	0.0013035	Hs.413416	221763_at
jumonji domain containing 6	JMJD6	14D	0.581852	0.00248685	Hs.514505	215233_at
jun D proto-oncogene	JUND	14D	0.736067	1.48381e-06	Hs.2780	203752_s_at
jun oncogene	JUN	14D	1.32145	0.000404995	Hs.525704	201466_s_at
Junction-mediating and regulatory protein	JMY	14D	1.15333	0.00128758	Hs.482605	226352_at
kalirin, RhoGEF kinase	KALRN	14D	0.700976	6.87775e-06	Hs.8004	206078_at
kallikrein-related peptidase 15	KLK15	14D	0.65768	0.00213567	Hs.567535	234495_at
Kruppel-like factor 6	KLF6	14D	1.24918	0.000353559	Hs.4055	1555832_s_at
Kruppel-like factor 6	KLF6	14D	1.28831	0.000497756	Hs.4055	224606_at
LanC lantibiotic synthetase component C-like 2 (bacterial)	LANCL2	14D	1.29204	0.00120056	Hs.655117	218219_s_at
large subunit GTPase 1 homolog (S. cerevisiae)	LSG1	14D	0.758272	0.000208213	Hs.518505	223200_s_at
latent transforming growth factor beta binding protein 4	LTBP4	14D	0.690399	3.30455e-05	Hs.466766	210628_x_at
LATS, large tumor suppressor, homolog 2 (Drosophila)	LATS2	14D	1.19288	0.00272028	Hs.78960	227013_at
LEM domain containing 3	LEMD3	14D	1.39829	0.000821446	Hs.505905	218604_at
Leucine rich repeat (in FLII) interacting protein 1	LRRFIP1	14D	0.742562	0.00145143	Hs.471779	227513_s_at
leucine rich repeat (in FLII) interacting protein 1	LRRFIP1	14D	0.790652	7.48913e-06	Hs.471779	223492_s_at
leucine rich repeat (in FLII) interacting protein 2	LRRFIP2	14D	1.19688	0.000326552	Hs.475319	232704_s_at
leucine rich repeat (in FLII) interacting protein 2	LRRFIP2	14D	1.20471	0.0001917	Hs.475319	218364_at
LIM domain 7	LMO7	14D	1.37357	4.18881e-05	Hs.207631	242722_at
LIM domain 7	LMO7	14D	1.39948	2.87835e-05	Hs.207631	1556377_s_at
LIM domain only 1 (rhombotin 1)	LMO1	14D	0.750745	0.00123983	Hs.654426	206718_at
MAX dimerization protein 4	MXD4	14D	1.24363	0.000657274	Hs.655020	210778_s_at
MAX-like protein X	MLX	14D	0.853856	0.00022483	Hs.383019	217909_s_at
MAX-like protein X	MLX	14D	0.861901	9.61634e-05	Hs.383019	213708_s_at
MAX-like protein X	MLX	14D	0.875202	0.000175672	Hs.383019	217910_x_at
membrane protein, palmitoylated 1, 55kDa	MPP1	14D	0.892707	0.00239373	Hs.496984	202974_at
meningioma expressed antigen 5 (hyaluronidase)	MGEA5	14D	1.2736	3.1198e-06	Hs.500842	200899_s_at
meningioma expressed antigen 5 (hyaluronidase)	MGEA5	14D	1.28838	0.000793902	Hs.500842	200898_s_at
mesoderm posterior 2 homolog (mouse)	MESP2	14D	1.22205	0.000281477	Hs.37311	1556015_a_at
mesoderm specific transcript homolog (mouse)	MEST	14D	1.29782	0.00198177	Hs.270978	202016_at
met proto-oncogene (hepatocyte growth factor receptor)	MET	14D	1.52267	0.000115175	Hs.132966	203510_at
microspherule protein 1	MCRS1	14D	0.825795	0.0026244	Hs.25313	202556_s_at
mindbomb homolog 1 (Drosophila)	MIB1	14D	1.33295	0.00230725	Hs.140903	224720_at
mitogen-activated protein kinase 1	MAPK1	14D	1.15051	0.00125359	Hs.431850	224621_at
mitogen-activated protein kinase 1	MAPK1	14D	1.17674	0.000178672	Hs.431850	212271_at
mitogen-activated protein kinase 1	MAPK1	14D	1.20896	0.00124475	Hs.431850	208351_s_at
mitogen-activated protein kinase 1	MAPK1	14D	1.21777	0.00127004	Hs.431850	1552264_a_at
mitogen-activated protein kinase kinase kinase 1	MAP3K1	14D	1.22497	0.000453315	Hs.657756	225927_at
mitogen-activated protein kinase kinase kinase 7	MAP3K7	14D	1.17283	0.000642337	Hs.644143	206854_s_at
mitogen-activated protein kinase kinase kinase kinase 4	MAP4K4	14D	1.32368	1.23651e-05	Hs.431550	222547_at
mitogen-activated protein kinase-activated protein kinase 2	MAPKAPK2	14D	0.818941	2.15629e-06	Hs.643566	201460_at
mitogen-activated protein kinase-activated protein kinase 3	MAPKAPK3	14D	0.785871	7.85779e-06	Hs.234521	202788_at
mitogen-activated protein kinase-activated protein kinase 3	MAPKAPK3	14D	0.804821	1.72618e-05	Hs.234521	202787_s_at
MLX interacting protein-like	MLXIPL	14D	0.787863	0.00188948	Hs.647055	221163_s_at
mucosa associated lymphoid tissue lymphoma translocation gene 1	MALT1	14D	1.25639	0.000604159	Hs.601217	208309_s_at
multiple EGF-like-domains 10	MEGF10	14D	1.58561	5.39647e-08	Hs.438709	232523_at
multiple EGF-like-domains 10	MEGF10	14D	1.87589	0.00010484	Hs.438709	236517_at
muscle RAS oncogene homolog	MRAS	14D	1.40723	7.07663e-05	Hs.527021	225185_at
mutL homolog 1, colon cancer, nonpolyposis type 2 (E. coli)	MLH1	14D	0.910152	0.00063505	Hs.195364	202520_s_at
MYB binding protein (P160) 1a	MYBBP1A	14D	0.743599	7.01461e-06	Hs.22824	219098_at
myeloid zinc finger 1	MZF1	14D	1.69959	0.00236221	Hs.399810	210336_x_at
myeloid/lymphoid or mixed-lineage leukemia (trithorax homolog, Drosophila); translocated to, 4	MLLT4	14D	1.1335	0.000653725	Hs.644024	224685_at
myeloid/lymphoid or mixed-lineage leukemia 3	MLL3	14D	1.23128	6.64461e-06	Hs.647120	222415_at
myeloid/lymphoid or mixed-lineage leukemia 3	MLL3	14D	1.24332	2.90802e-06	Hs.647120	222414_at
myocyte enhancer factor 2A	MEF2A	14D	1.15631	2.068e-05	Hs.268675	212535_at
myocyte enhancer factor 2A	MEF2A	14D	1.17874	2.58718e-05	Hs.268675	208328_s_at
myocyte enhancer factor 2C	MEF2C	14D	1.21774	0.000288047	Hs.654474	207968_s_at
MYST histone acetyltransferase (monocytic leukemia) 4	MYST4	14D	1.16289	0.0025658	Hs.35758	212462_at
NDRG family member 2	NDRG2	14D	1.36135	0.000237847	Hs.525205	214279_s_at
Nedd4 family interacting protein 2	NDFIP2	14D	1.102	0.000946894	Hs.525093	224801_at
neogenin homolog 1 (chicken)	NEO1	14D	1.18126	0.00144221	Hs.388613	204321_at
nephronophthisis 3 (adolescent)	NPHP3	14D	1.18431	0.0024612	Hs.511991	235410_at
nescient helix loop helix 2	NHLH2	14D	1.9363	0.00153005	Hs.657159	215228_at
neuregulin 2	NRG2	14D	0.573514	0.00143939	Hs.408515	206879_s_at
neuropeptide Y receptor Y6 (pseudogene)	NPY6R	14D	0.590831	0.000511997	Hs.660879	210444_at
Neuropeptide Y receptor Y6 (pseudogene)	NPY6R	14D	0.618742	4.91773e-05	Hs.660879	236860_at
Nitric oxide synthase 1 (neuronal)	NOS1	14D	0.520676	0.00256173	Hs.654410	240911_at
Nitric oxide synthase 1 (neuronal)	NOS1	14D	0.684318	0.000118615	Hs.654410	239132_at
NKF3 kinase family member	SGK269	14D	1.1957	4.0803e-05	Hs.9587	225913_at
non-metastatic cells 2, protein (NM23B) expressed in /// NM23-LV	NME1-NME2 /// NME2	14D	0.86817	0.000417741	---	201268_at
non-POU domain containing, octamer-binding	NONO	14D	1.0647	8.04706e-05	Hs.533282	200057_s_at
Notch homolog 2 (Drosophila) N-terminal like	NOTCH2NL	14D	1.39928	2.21115e-05	Hs.515947	227067_x_at
Notch homolog 2 (Drosophila) N-terminal like	NOTCH2NL	14D	1.40333	5.07684e-05	Hs.515947	214722_at
NUAK family, SNF1-like kinase, 1	NUAK1	14D	1.17179	0.00172735	Hs.524692	204589_at
nuclear factor (erythroid-derived 2)-like 2	NFE2L2	14D	1.14792	0.00129891	Hs.155396	201146_at
nuclear factor of activated T-cells, cytoplasmic, calcineurin-dependent 2 interacting protein	NFATC2IP	14D	1.1996	0.000409596	Hs.513470	217526_at
nuclear factor of activated T-cells, cytoplasmic, calcineurin-dependent 3	NFATC3	14D	1.23038	0.00144734	Hs.632209	210555_s_at
nuclear factor of kappa light polypeptide gene enhancer in B-cells inhibitor, alpha	NFKBIA	14D	1.34088	0.00270581	Hs.81328	201502_s_at
nuclear receptor co-repressor 2	NCOR2	14D	0.781431	5.55042e-06	Hs.137510	207760_s_at
nuclear receptor coactivator 1	NCOA1	14D	1.21379	0.000754326	Hs.412293	209105_at
nuclear receptor subfamily 2, group C, member 1	NR2C1	14D	1.1694	0.000704483	Hs.108301	204791_at
nuclear receptor subfamily 4, group A, member 1	NR4A1	14D	0.771765	0.00218879	Hs.524430	202340_x_at
nuclear transcription factor Y, gamma	NFYC	14D	0.883098	0.00022303	Hs.233458	202215_s_at
nucleobindin 2	NUCB2	14D	1.48816	5.91439e-09	Hs.654599	203675_at
nucleoporin 133kDa	NUP133	14D	1.18166	0.00057285	Hs.12457	202184_s_at
nucleoporin 62kDa C-terminal like	NUP62CL	14D	0.451952	0.000541637	Hs.163629	220520_s_at
nucleoporin like 1	NUPL1	14D	1.24785	0.00184219	---	204435_at
O-linked N-acetylglucosamine (GlcNAc) transferase (UDP-N-acetylglucosamine:polypeptide-N-acetylglucosaminyl transferase)	OGT	14D	1.20646	4.45668e-05	Hs.405410	207563_s_at
O-linked N-acetylglucosamine (GlcNAc) transferase (UDP-N-acetylglucosamine:polypeptide-N-acetylglucosaminyl transferase)	OGT	14D	1.25454	1.51657e-05	Hs.405410	207564_x_at
O-linked N-acetylglucosamine (GlcNAc) transferase (UDP-N-acetylglucosamine:polypeptide-N-acetylglucosaminyl transferase)	OGT	14D	1.2748	2.11591e-06	Hs.405410	209240_at
O-linked N-acetylglucosamine (GlcNAc) transferase (UDP-N-acetylglucosamine:polypeptide-N-acetylglucosaminyl transferase)	OGT	14D	1.39424	0.00245352	Hs.405410	229787_s_at
oxysterol binding protein	OSBP	14D	1.15367	0.00203366	Hs.597091	201799_s_at
oxysterol binding protein	OSBP	14D	1.29473	0.000527116	Hs.597091	1563051_at
p21/Cdc42/Rac1-activated kinase 1 (STE20 homolog, yeast)	PAK1	14D	1.2147	1.38346e-05	Hs.435714	226507_at
paired box gene 3 (Waardenburg syndrome 1)	PAX3	14D	1.37554	0.00106359	Hs.42146	231666_at
paired related homeobox 1	PRRX1	14D	1.29348	0.000790281	Hs.283416	205991_s_at
paired related homeobox 1	PRRX1	14D	1.41607	4.55923e-05	Hs.283416	226695_at
par-3 partitioning defective 3 homolog (C. elegans)	PARD3	14D	1.21765	0.00242767	Hs.131489	210094_s_at
parvalbumin	PVALB	14D	2.63945	0.00182105	Hs.295449	205336_at
PCTAIRE protein kinase 1	PCTK1	14D	0.810816	0.00137036	Hs.496068	208823_s_at
PCTAIRE protein kinase 1	PCTK1	14D	0.841667	0.000344452	Hs.496068	208824_x_at
PCTAIRE protein kinase 1	PCTK1	14D	0.861868	1.44809e-05	Hs.496068	207239_s_at
PDZ and LIM domain 5	PDLIM5	14D	0.792879	0.000100234	Hs.480311	213684_s_at
PDZ and LIM domain 5	PDLIM5	14D	0.795896	9.20846e-06	Hs.480311	221994_at
peroxisome proliferator-activated receptor alpha	PPARA	14D	0.739527	1.93458e-06	Hs.103110	223438_s_at
peroxisome proliferator-activated receptor alpha	PPARA	14D	0.762833	0.00161831	Hs.103110	1560981_a_at
peroxisome proliferator-activated receptor alpha	PPARA	14D	0.77174	2.19791e-06	Hs.103110	226978_at
peroxisome proliferator-activated receptor alpha	PPARA	14D	0.780563	4.31263e-05	Hs.103110	223437_at
peroxisome proliferator-activated receptor alpha	PPARA	14D	0.801543	0.0017551	Hs.103110	244689_at
peroxisome proliferator-activated receptor alpha	PPARA	14D	0.84682	0.00153635	Hs.103110	1558631_at
peroxisome proliferator-activated receptor gamma, coactivator 1 alpha	PPARGC1A	14D	0.683248	0.000236103	Hs.527078	219195_at
phosphatidic acid phosphatase type 2 domain containing 1B	PPAPDC1B	14D	2.83862	9.05738e-05	Hs.567619	226384_at
phosphatidylethanolamine-binding protein 4	PEBP4	14D	0.632654	0.000225218	Hs.491242	227848_at
Phosphatidylinositol transfer protein, cytoplasmic 1	PITPNC1	14D	0.545366	0.00150038	Hs.591185	227589_at
phosphodiesterase 11A	PDE11A	14D	2.04207	1.50082e-05	Hs.570273	224224_s_at
phosphodiesterase 11A	PDE11A	14D	2.18514	1.3296e-08	Hs.570273	237248_at
phosphodiesterase 4A, cAMP-specific (phosphodiesterase E2 dunce homolog, Drosophila)	PDE4A	14D	0.646548	0.00116794	Hs.89901	211447_s_at
phosphodiesterase 4A, cAMP-specific (phosphodiesterase E2 dunce homolog, Drosophila)	PDE4A	14D	0.74216	0.000113689	Hs.89901	204735_at
phosphodiesterase 5A, cGMP-specific	PDE5A	14D	1.80347	0.0002112	Hs.647971	227088_at
phosphoinositide-3-kinase, regulatory subunit 1 (p85 alpha)	PIK3R1	14D	1.23063	0.00159663	Hs.132225	212239_at
phosphoinositide-3-kinase, regulatory subunit 2 (p85 beta)	PIK3R2	14D	1.22523	0.00208302	Hs.371344	1568629_s_at
phospholipase A1 member A	PLA1A	14D	1.6943	0.00162365	Hs.437451	219584_at
phospholipase A2, group VI (cytosolic, calcium-independent)	PLA2G6	14D	1.13554	0.00250923	Hs.170479	204691_x_at
phospholipase C-like 2	PLCL2	14D	0.848829	0.0015541	Hs.202010	213309_at
phospholipase C, epsilon 1	PLCE1	14D	1.95583	1.35911e-07	Hs.655033	205111_s_at
phospholipase C, epsilon 1	PLCE1	14D	2.20952	5.59153e-06	Hs.655033	205112_at
pim-3 oncogene	PIM3	14D	0.852491	0.00219779	Hs.530381	224739_at
pogo transposable element with ZNF domain	POGZ	14D	1.54533	0.000253675	Hs.591471	212153_at
poly (ADP-ribose) polymerase family, member 15	PARP15	14D	0.549336	0.00249676	Hs.120250	1564310_a_at
polyamine-modulated factor 1	PMF1	14D	0.858881	0.000276393	Hs.530479	202337_at
polycomb group ring finger 2	PCGF2	14D	0.865056	0.00217704	Hs.371617	203793_x_at
polyhomeotic homolog 3 (Drosophila)	PHC3	14D	1.14946	2.7391e-05	Hs.529592	226508_at
polymerase I and transcript release factor	PTRF	14D	1.13393	0.00108369	Hs.437191	208789_at
POU domain, class 2, transcription factor 2	POU2F2	14D	0.791083	0.00218826	Hs.654420	229750_at
PR domain containing 2, with ZNF domain	PRDM2	14D	1.16327	0.00154192	Hs.371823	203057_s_at
pre-B-cell colony enhancing factor 1	PBEF1	14D	0.794818	2.30313e-05	Hs.489615	217739_s_at
pre-B-cell colony enhancing factor 1	PBEF1	14D	0.820778	1.99832e-05	Hs.489615	217738_at
pre-B-cell leukemia homeobox interacting protein 1	PBXIP1	14D	1.2626	3.02394e-05	Hs.505806	214177_s_at
pregnancy specific beta-1-glycoprotein 1	PSG1	14D	0.428857	0.000104841	Hs.654413	210196_s_at
programmed cell death 4 (neoplastic transformation inhibitor)	PDCD4	14D	1.22813	0.00130881	Hs.232543	202731_at
programmed cell death 6 interacting protein	PDCD6IP	14D	1.13647	0.00158447	Hs.475896	217746_s_at
prohibitin 2	PHB2	14D	0.782353	2.47486e-08	Hs.504620	201600_at
proline-rich nuclear receptor coactivator 1	PNRC1	14D	1.22092	0.00031499	Hs.75969	209034_at
promyelocytic leukemia	PML	14D	0.836739	0.000437218	Hs.526464	209640_at
prospero homeobox 1	PROX1	14D	0.784015	0.00243564	Hs.585369	207401_at
protein arginine methyltransferase 2	PRMT2	14D	1.27545	2.75109e-05	Hs.154163	202098_s_at
protein arginine methyltransferase 2	PRMT2	14D	2.98182	0.000222317	Hs.154163	228725_x_at
protein kinase C, theta	PRKCQ	14D	0.87436	0.000508409	Hs.498570	210038_at
protein kinase, AMP-activated, alpha 1 catalytic subunit	PRKAA1	14D	1.32693	0.00157138	Hs.43322	225984_at
protein kinase, AMP-activated, gamma 3 non-catalytic subunit	PRKAG3	14D	1.21741	0.0019424	Hs.591634	223904_at
protein kinase, cAMP-dependent, regulatory, type I, alpha (tissue specific extinguisher 1)	PRKAR1A	14D	1.3842	0.000716704	Hs.280342	242482_at
protein kinase, cAMP-dependent, regulatory, type I, alpha (tissue specific extinguisher 1)	PRKAR1A	14D	1.41841	4.87866e-06	Hs.280342	200605_s_at
protein kinase, cAMP-dependent, regulatory, type I, alpha (tissue specific extinguisher 1)	PRKAR1A	14D	1.42931	3.03736e-06	Hs.280342	200603_at
protein kinase, cAMP-dependent, regulatory, type I, alpha (tissue specific extinguisher 1)	PRKAR1A	14D	1.59781	4.95043e-05	Hs.280342	200604_s_at
protein phosphatase 1, regulatory (inhibitor) subunit 1A	PPP1R1A	14D	0.650257	2.85796e-05	Hs.505662	235129_at
protein phosphatase 1, regulatory (inhibitor) subunit 1A	PPP1R1A	14D	0.727421	6.24252e-05	Hs.505662	205478_at
protein phosphatase 1, regulatory (inhibitor) subunit 3A (glycogen and sarcoplasmic reticulum binding subunit, skeletal muscle)	PPP1R3A	14D	0.849542	0.000790616	Hs.458309	206895_at
protein phosphatase 1, regulatory (inhibitor) subunit 3C	PPP1R3C	14D	0.843082	0.00285937	Hs.303090	204284_at
protein phosphatase 1B (formerly 2C), magnesium-dependent, beta isoform	PPM1B	14D	0.778533	0.00088087	Hs.416769	213225_at
protein phosphatase 1J (PP2C domain containing)	PPM1J	14D	0.721609	0.000251088	Hs.655231	229484_at
protein phosphatase 2 (formerly 2A), catalytic subunit, beta isoform	PPP2CB	14D	0.884154	0.00166359	Hs.491440	201375_s_at
protein phosphatase 2 (formerly 2A), regulatory subunit B'', alpha	PPP2R3A	14D	0.743436	3.53913e-05	Hs.518155	209633_at
protein phosphatase 2 (formerly 2A), regulatory subunit B'', alpha	PPP2R3A	14D	0.75256	0.000708485	Hs.518155	209632_at
protein phosphatase 2 (formerly 2A), regulatory subunit B'', alpha	PPP2R3A	14D	0.768606	0.000447718	Hs.518155	207749_s_at
protein phosphatase 2, regulatory subunit B', epsilon isoform	PPP2R5E	14D	0.892505	0.000268447	Hs.334868	203338_at
Protein phosphatase 2, regulatory subunit B', gamma isoform	PPP2R5C	14D	0.808737	0.00140447	Hs.368264	214083_at
protein phosphatase 2A activator, regulatory subunit 4	PPP2R4	14D	0.687198	1.34597e-07	Hs.400740	206452_x_at
protein phosphatase 2A activator, regulatory subunit 4	PPP2R4	14D	0.723333	8.79831e-06	Hs.400740	216105_x_at
protein phosphatase 2A activator, regulatory subunit 4	PPP2R4	14D	0.792849	0.000643784	Hs.400740	208874_x_at
protein phosphatase 2C, magnesium-dependent, catalytic subunit	PPM2C	14D	0.615576	3.28757e-05	Hs.22265	218273_s_at
protein phosphatase 2C, magnesium-dependent, catalytic subunit	PPM2C	14D	0.625046	0.000211975	Hs.22265	222572_at
protein phosphatase 3 (formerly 2B), catalytic subunit, beta isoform	PPP3CB	14D	0.780234	0.00197544	Hs.500067	209817_at
protein phosphatase 3 (formerly 2B), catalytic subunit, beta isoform	PPP3CB	14D	0.885956	0.0018018	Hs.500067	202432_at
protein phosphatase methylesterase 1	PPME1	14D	1.22819	0.000314581	Hs.503251	49077_at
protein phosphatase methylesterase 1	PPME1	14D	1.37744	0.00109607	Hs.503251	217841_s_at
protein tyrosine phosphatase type IVA, member 1	PTP4A1	14D	0.641425	0.000705881	Hs.227777	200730_s_at
protein tyrosine phosphatase type IVA, member 1	PTP4A1	14D	0.690933	1.23319e-06	Hs.227777	200733_s_at
protein tyrosine phosphatase type IVA, member 1	PTP4A1	14D	0.776007	3.36865e-05	Hs.227777	200731_s_at
protein tyrosine phosphatase type IVA, member 1	PTP4A1	14D	0.798256	8.35485e-06	Hs.227777	200732_s_at
protein tyrosine phosphatase type IVA, member 3	PTP4A3	14D	0.741798	4.67518e-05	Hs.43666	206574_s_at
protein tyrosine phosphatase type IVA, member 3	PTP4A3	14D	0.777368	0.000126908	Hs.43666	209695_at
protein tyrosine phosphatase-like (proline instead of catalytic arginine), member A	PTPLA	14D	0.759597	0.000630146	Hs.114062	219654_at
protein tyrosine phosphatase-like A domain containing 1	PTPLAD1	14D	1.17708	0.00280509	Hs.512973	222404_x_at
protein tyrosine phosphatase-like A domain containing 1	PTPLAD1	14D	1.20445	0.00119563	Hs.512973	234000_s_at
protein tyrosine phosphatase, non-receptor type 21	PTPN21	14D	1.54222	0.000227191	Hs.437040	1320_at
protein tyrosine phosphatase, non-receptor type 3	PTPN3	14D	0.659388	3.3033e-05	Hs.436429	203997_at
protein tyrosine phosphatase, receptor type, f polypeptide (PTPRF), interacting protein (liprin), alpha 1	PPFIA1	14D	1.1702	0.000691576	Hs.530749	202066_at
protein tyrosine phosphatase, receptor type, K	PTPRK	14D	1.19055	0.000286186	Hs.155919	203038_at
protein-L-isoaspartate (D-aspartate) O-methyltransferase domain containing 1	PCMTD1	14D	1.18793	0.000329415	Hs.308480	226119_at
prothymosin, alpha (gene sequence 28)	PTMA	14D	1.1427	0.00154532	Hs.459927	211921_x_at
prothymosin, alpha (gene sequence 28) /// similar to prothymosin, alpha (gene sequence 28)	LOC643287 /// PTMA	14D	1.13435	0.00112573	Hs.459927	200773_x_at
PTC7 protein phosphatase homolog (S. cerevisiae)	PPTC7	14D	0.675706	4.45703e-05	Hs.13854	235744_at
PTC7 protein phosphatase homolog (S. cerevisiae)	PPTC7	14D	0.701134	1.04685e-06	Hs.13854	225213_at
PTC7 protein phosphatase homolog (S. cerevisiae)	PPTC7	14D	0.721251	5.97892e-06	Hs.13854	225204_at
putative homeodomain transcription factor 1	PHTF1	14D	1.8377	0.0017762	Hs.655824	215285_s_at
PX domain containing serine/threonine kinase	PXK	14D	1.18819	0.00110261	Hs.190544	225796_at
pyrophosphatase (inorganic) 2	PPA2	14D	0.828424	0.0017906	Hs.654957	220741_s_at
pyrophosphatase (inorganic) 2	PPA2	14D	0.837071	0.000493595	Hs.654957	1556285_s_at
quaking homolog, KH domain RNA binding (mouse)	QKI	14D	0.827241	0.00281978	Hs.510324	212636_at
R-spondin 3 homolog (Xenopus laevis)	RSPO3	14D	0.777362	0.000216344	Hs.135254	228186_s_at
Rac/Cdc42 guanine nucleotide exchange factor (GEF) 6	ARHGEF6	14D	0.728366	6.5392e-07	Hs.522795	209539_at
RAD1 homolog (S. pombe)	RAD1	14D	0.828946	0.000597792	Hs.531879	210216_x_at
Ran GTPase activating protein 1	RANGAP1	14D	1.2267	0.00148443	Hs.183800	212125_at
rapamycin-insensitive companion of mTOR	RICTOR	14D	1.23352	0.00264793	Hs.407926	226312_at
Ras association (RalGDS/AF-6) and pleckstrin homology domains 1	RAPH1	14D	1.51477	7.36639e-07	Hs.471162	225188_at
Ras association (RalGDS/AF-6) and pleckstrin homology domains 1	RAPH1	14D	1.67942	0.00270454	Hs.471162	225186_at
Ras association (RalGDS/AF-6) and pleckstrin homology domains 1	RAPH1	14D	1.68627	4.16133e-07	Hs.471162	225189_s_at
RAS guanyl releasing protein 2 (calcium and DAG-regulated)	RASGRP2	14D	0.798288	0.00222975	Hs.99491	214369_s_at
Ras homolog enriched in brain	RHEB	14D	1.71706	0.000527715	Hs.647068	201452_at
ras homolog gene family, member A	RHOA	14D	1.2738	7.29844e-05	Hs.247077	200059_s_at
ras homolog gene family, member A	RHOA	14D	1.30461	2.49127e-05	Hs.247077	1555814_a_at
ras homolog gene family, member B	RHOB	14D	1.53238	0.00163544	Hs.502876	1553962_s_at
ras homolog gene family, member B	RHOB	14D	1.57863	6.2419e-06	Hs.502876	212099_at
ras homolog gene family, member T1	RHOT1	14D	1.11983	0.000628082	Hs.655325	222148_s_at
RAS p21 protein activator (GTPase activating protein) 1	RASA1	14D	1.18826	5.80163e-06	Hs.553501	210621_s_at
RAS protein activator like 2	RASAL2	14D	1.47407	0.00207625	Hs.656823	222810_s_at
Ras-associated protein Rap1	RBJ	14D	0.804322	0.00226224	Hs.434993	227859_at
RAS-like, family 12	RASL12	14D	0.765213	0.000352132	Hs.27018	219167_at
Ras-related associated with diabetes	RRAD	14D	2.05622	0.00135082	Hs.1027	231100_at
ras-related C3 botulinum toxin substrate 2 (rho family, small GTP binding protein Rac2)	RAC2	14D	1.47296	0.00274613	Hs.517601	213603_s_at
Ras-related GTP binding D	RRAGD	14D	0.822003	0.00176631	Hs.485938	221523_s_at
RCD1 required for cell differentiation1 homolog (S. pombe)	RQCD1	14D	0.800989	9.70583e-05	Hs.148767	1553510_s_at
RCD1 required for cell differentiation1 homolog (S. pombe)	RQCD1	14D	0.830476	0.0014971	Hs.148767	213179_at
receptor (G protein-coupled) activity modifying protein 1	RAMP1	14D	0.7781	6.01459e-07	Hs.471783	204916_at
receptor expressed in lymphoid tissues like 1	RELL1	14D	0.848157	0.000140479	Hs.283378	226430_at
recombination signal binding protein for immunoglobulin kappa J region	RBPJ	14D	1.2349	0.00026683	Hs.479396	207785_s_at
regulator of chromosome condensation (RCC1) and BTB (POZ) domain containing protein 2	RCBTB2	14D	1.31661	0.000754648	Hs.657385	204759_at
regulator of G-protein signalling 3	RGS3	14D	0.605881	9.06813e-08	Hs.494875	203823_at
regulator of G-protein signalling 4	RGS4	14D	0.541926	0.000329929	Hs.386726	204337_at
related RAS viral (r-ras) oncogene homolog 2	RRAS2	14D	0.815593	0.000948548	Hs.502004	212589_at
replication protein A1, 70kDa	RPA1	14D	1.13716	0.0022228	Hs.461925	201528_at
replication protein A1, 70kDa	RPA1	14D	1.138	0.00031685	Hs.461925	201529_s_at
retinoblastoma binding protein 7	RBBP7	14D	1.14175	5.11013e-05	Hs.495755	201092_at
retinoid X receptor, beta	RXRB	14D	1.16558	0.00172568	Hs.388034	209148_at
Rho GTPase activating protein 12	ARHGAP12	14D	1.42189	4.36379e-07	Hs.499264	207606_s_at
Rho GTPase activating protein 17	ARHGAP17	14D	1.22104	0.000150416	Hs.373793	218076_s_at
Rho GTPase activating protein 26	ARHGAP26	14D	1.20741	0.00274934	Hs.654668	226576_at
Rho GTPase activating protein 28	ARHGAP28	14D	1.64304	3.8102e-05	Hs.183114	227911_at
Rho-related BTB domain containing 1	RHOBTB1	14D	1.23904	0.000670019	Hs.148670	212651_at
runt-related transcription factor 1 (acute myeloid leukemia 1; aml1 oncogene)	RUNX1	14D	0.554042	0.00046011	Hs.149261	211179_at
S-phase kinase-associated protein 1A (p19A)	SKP1A	14D	1.15588	0.000975129	Hs.171626	200719_at
S-phase kinase-associated protein 1A (p19A)	SKP1A	14D	1.16891	1.51973e-05	Hs.171626	200711_s_at
S-phase kinase-associated protein 1A (p19A)	SKP1A	14D	1.20693	2.98869e-06	Hs.171626	207974_s_at
S-phase response (cyclin-related)	SPHAR	14D	0.867462	0.00135325	---	206272_at
serine/threonine kinase 24 (STE20 homolog, yeast)	STK24	14D	0.876686	0.000655641	Hs.508514	208855_s_at
serine/threonine kinase 35	STK35	14D	0.754245	0.000879908	Hs.100057	225649_s_at
serine/threonine kinase 38 like	STK38L	14D	1.25108	0.00261265	Hs.184523	212572_at
serum response factor (c-fos serum response element-binding transcription factor)	SRF	14D	0.818475	0.000223406	Hs.520140	202401_s_at
SH2B adaptor protein 2	SH2B2	14D	0.807627	2.83856e-05	Hs.489448	205367_at
SH3-binding domain kinase 1	SBK1	14D	0.706717	3.07141e-05	Hs.97837	226548_at
SH3-binding domain kinase 1	SBK1	14D	0.775611	0.000444441	Hs.97837	226549_at
SH3-domain GRB2-like endophilin B1	SH3GLB1	14D	1.15243	4.90073e-05	Hs.136309	210101_x_at
SH3-domain GRB2-like endophilin B1	SH3GLB1	14D	1.1846	3.52836e-07	Hs.136309	209091_s_at
SH3-domain kinase binding protein 1	SH3KBP1	14D	0.670977	6.55147e-05	Hs.444770	1554168_a_at
SH3-domain kinase binding protein 1	SH3KBP1	14D	0.697163	1.31112e-06	Hs.444770	223082_at
SHC (Src homology 2 domain containing) transforming protein 1	SHC1	14D	1.22632	0.00252958	Hs.433795	214853_s_at
signal transducer and activator of transcription 3 (acute-phase response factor)	STAT3	14D	0.903091	0.00136678	Hs.463059	208991_at
signal transducing adaptor molecule (SH3 domain and ITAM motif) 1	STAM	14D	1.16818	3.58952e-05	Hs.441498	203544_s_at
signal-regulatory protein alpha	SIRPA	14D	1.7753	4.71737e-05	Hs.581021	202897_at
sirtuin (silent mating type information regulation 2 homolog) 2 (S. cerevisiae)	SIRT2	14D	0.819968	2.8682e-05	Hs.466693	220605_s_at
sirtuin (silent mating type information regulation 2 homolog) 5 (S. cerevisiae)	SIRT5	14D	0.76231	1.12881e-05	Hs.567431	219185_at
sirtuin (silent mating type information regulation 2 homolog) 5 (S. cerevisiae)	SIRT5	14D	1.58756	0.00277814	Hs.567431	221010_s_at
SMAD family member 1	SMAD1	14D	1.19221	0.000101873	Hs.656534	227798_at
SON DNA binding protein	SON	14D	1.09915	0.00242661	Hs.517262	201085_s_at
sorting nexin 3	SNX3	14D	0.84865	0.000185077	Hs.12102	213545_x_at
Sp1 transcription factor	SP1	14D	1.14375	0.000199646	Hs.649191	224754_at
SPEG complex locus	SPEG	14D	0.813993	0.00177032	Hs.21639	232153_at
SRY (sex determining region Y)-box 17	SOX17	14D	0.799121	0.00104487	Hs.98367	219993_at
SRY (sex determining region Y)-box 18	SOX18	14D	0.749653	0.000305086	Hs.8619	219568_x_at
SRY (sex determining region Y)-box 4	SOX4	14D	1.48231	0.00117511	Hs.643910	201417_at
sterile alpha motif and leucine zipper containing kinase AZK	ZAK	14D	0.833017	0.0012663	Hs.444451	238613_at
sterile alpha motif and leucine zipper containing kinase AZK	ZAK	14D	0.873683	0.00194348	Hs.444451	223519_at
sterile alpha motif and leucine zipper containing kinase AZK	ZAK	14D	0.880248	0.00223629	Hs.444451	225662_at
stratifin	SFN	14D	1.21184	0.000551518	Hs.523718	33322_i_at
suppressor of hairy wing homolog 3 (Drosophila)	SUHW3	14D	1.92545	0.00125369	Hs.308418	235520_at
suppressor of hairy wing homolog 4 (Drosophila)	SUHW4	14D	1.35562	4.70067e-05	Hs.511477	221213_s_at
suppressor of variegation 4-20 homolog 1 (Drosophila)	SUV420H1	14D	1.12603	0.000528754	Hs.632120	218242_s_at
sushi-repeat-containing protein, X-linked	SRPX	14D	1.36102	0.00115591	Hs.15154	204955_at
synovial sarcoma, X breakpoint 2 interacting protein	SSX2IP	14D	1.78232	0.00168452	Hs.22587	203017_s_at
TANK-binding kinase 1	TBK1	14D	1.22796	5.23948e-06	Hs.505874	218520_at
tankyrase, TRF1-interacting ankyrin-related ADP-ribose polymerase	TNKS	14D	1.1777	9.85498e-05	Hs.370267	202561_at
TATA element modulatory factor 1	TMF1	14D	1.33893	0.000180385	Hs.267632	214948_s_at
tau tubulin kinase 2	TTBK2	14D	1.27181	0.000187056	Hs.659846	213922_at
Tau tubulin kinase 2	TTBK2	14D	1.55914	8.93592e-05	Hs.659846	240011_at
TBC1 (tre-2/USP6, BUB2, cdc16) domain family, member 1	TBC1D1	14D	0.846369	0.00025447	Hs.176503	227945_at
TEA domain family member 1 (SV40 transcriptional enhancer factor)	TEAD1	14D	0.854186	9.15529e-06	Hs.655331	224955_at
teashirt family zinc finger 1	TSHZ1	14D	1.16619	0.00201078	Hs.284217	223283_s_at
teashirt family zinc finger 1	TSHZ1	14D	1.21022	0.00015147	Hs.284217	223282_at
TEK tyrosine kinase, endothelial (venous malformations, multiple cutaneous and mucosal)	TEK	14D	1.2356	4.83224e-05	Hs.89640	206702_at
thymocyte nuclear protein 1	THYN1	14D	1.18134	0.00285204	Hs.13645	223711_s_at
TNFRSF1A-associated via death domain	TRADD	14D	1.62068	0.000128133	Hs.460996	1729_at
TRAF2 and NCK interacting kinase	TNIK	14D	0.84007	0.000880342	Hs.34024	239288_at
transducer of ERBB2, 1	TOB1	14D	0.773292	0.000132612	Hs.653129	202704_at
transducin (beta)-like 1X-linked receptor 1	TBL1XR1	14D	1.18773	0.00201052	Hs.581171	221428_s_at
transformation/transcription domain-associated protein	TRRAP	14D	1.21409	0.000507491	Hs.203952	202642_s_at
transforming growth factor beta regulator 4	TBRG4	14D	0.737791	0.000638153	Hs.231411	220961_s_at
transmembrane anterior posterior transformation 1	TAPT1	14D	0.788863	0.000367749	Hs.479223	226735_at
transmembrane, prostate androgen induced RNA	TMEPAI	14D	0.761256	0.00127147	Hs.517155	222449_at
trinucleotide repeat containing 15	TNRC15	14D	1.17522	0.000189713	Hs.565319	212260_at
tripartite motif-containing 33	TRIM33	14D	1.2697	2.94662e-05	Hs.26837	212435_at
tripartite motif-containing 45	TRIM45	14D	1.34695	1.55388e-07	Hs.301526	242056_at
tripartite motif-containing 45	TRIM45	14D	1.47082	2.09988e-07	Hs.301526	219923_at
TRK-fused gene	TFG	14D	1.1824	8.96585e-05	Hs.518123	217839_at
TSC22 domain family, member 1	TSC22D1	14D	1.23184	0.000593355	Hs.507916	215111_s_at
TSPY-like 2	TSPYL2	14D	1.84851	7.72685e-07	Hs.136164	218012_at
tuberous sclerosis 1	TSC1	14D	0.84801	0.000123443	Hs.370854	209390_at
tumor necrosis factor, alpha-induced protein 3	TNFAIP3	14D	1.40401	0.000508181	Hs.591338	202644_s_at
tumor necrosis factor, alpha-induced protein 3	TNFAIP3	14D	1.49385	1.54183e-05	Hs.591338	202643_s_at
tumor protein p53 inducible nuclear protein 1	TP53INP1	14D	1.52187	2.48845e-06	Hs.492261	225912_at
tumor protein p53 inducible nuclear protein 2	TP53INP2	14D	0.461959	9.25618e-09	Hs.516994	224836_at
tumor protein p73-like	TP73L	14D	1.44624	1.84351e-06	Hs.137569	209863_s_at
tumor protein p73-like	TP73L	14D	1.539	2.92682e-05	Hs.137569	207382_at
tumor protein p73-like	TP73L	14D	1.54124	0.000161307	Hs.137569	211194_s_at
UL16 binding protein 3	ULBP3	14D	0.677866	0.00278393	Hs.326556	231748_at
upregulated during skeletal muscle growth 5 homolog (mouse)	USMG5	14D	0.818268	5.23614e-09	Hs.500921	225413_at
upstream transcription factor 2, c-fos interacting	USF2	14D	0.849562	9.36343e-05	Hs.454534	214879_x_at
v-erb-b2 erythroblastic leukemia viral oncogene homolog 3 (avian)	ERBB3	14D	2.73983	9.58908e-05	Hs.118681	226213_at
v-ets erythroblastosis virus E26 oncogene homolog (avian)	ERG	14D	0.593545	0.00105665	Hs.473819	211626_x_at
v-Ki-ras2 Kirsten rat sarcoma viral oncogene homolog	KRAS	14D	1.16602	0.00267815	Hs.505033	204009_s_at
v-maf musculoaponeurotic fibrosarcoma oncogene homolog G (avian) /// similar to v-maf musculoaponeurotic fibrosarcoma oncogene family, protein G	LOC644132 /// MAFG	14D	1.3038	0.00265782	Hs.252229	204970_s_at
v-myc myelocytomatosis viral oncogene homolog (avian)	MYC	14D	1.70514	0.00176547	Hs.202453	202431_s_at
v-raf murine sarcoma 3611 viral oncogene homolog	ARAF	14D	0.851175	1.36287e-05	Hs.446641	201895_at
v-src sarcoma (Schmidt-Ruppin A-2) viral oncogene homolog (avian)	SRC	14D	1.49302	0.000559499	Hs.195659	213324_at
VENT homeobox (Xenopus laevis) pseudogene 1	VENTXP1	14D	2.27949	0.00070384	---	216722_at
vestigial like 2 (Drosophila)	VGLL2	14D	0.795214	0.00160931	Hs.99324	236352_at
virus-induced signaling adapter	VISA	14D	0.814551	0.000130501	Hs.646283	231829_at
Virus-induced signaling adapter	VISA	14D	0.843222	0.00157302	Hs.646283	226495_at
WD repeat and SOCS box-containing 1	WSB1	14D	1.12826	0.00148807	Hs.446017	201296_s_at
WD repeat and SOCS box-containing 1	WSB1	14D	1.20217	5.35438e-05	Hs.446017	201294_s_at
Wingless-type MMTV integration site family, member 9A	WNT9A	14D	1.56573	0.000123337	Hs.149504	230643_at
wings apart-like homolog (Drosophila)	WAPAL	14D	1.17966	0.00276459	Hs.203099	1554441_a_at
WNK lysine deficient protein kinase 1	WNK1	14D	0.797408	0.000658363	Hs.356604	211993_at
WNK lysine deficient protein kinase 1	WNK1	14D	0.872324	3.84709e-05	Hs.356604	211992_at
WNK lysine deficient protein kinase 2	WNK2	14D	0.758596	0.000370453	Hs.654856	229547_s_at
WNT1 inducible signaling pathway protein 2	WISP2	14D	1.48566	0.00276013	Hs.592145	205792_at
WW domain containing transcription regulator 1	WWTR1	14D	1.58293	0.00235913	Hs.655312	202134_s_at
Yes-associated protein 1, 65kDa	YAP1	14D	1.28699	0.00202777	Hs.503692	224895_at
Yes-associated protein 1, 65kDa	YAP1	14D	1.28831	7.91493e-06	Hs.503692	224894_at
YTH domain containing 1	YTHDC1	14D	1.14059	0.00207789	Hs.175955	212455_at
zinc finger E-box binding homeobox 1	ZEB1	14D	1.16986	0.00281286	Hs.124503	212758_s_at
zinc finger E-box binding homeobox 1	ZEB1	14D	1.259	0.000793334	Hs.124503	210875_s_at
zinc finger protein 24	ZNF24	14D	1.23251	0.00192646	Hs.591057	203248_at
zinc finger protein 260	ZNF260	14D	1.12945	0.00234036	Hs.18103	228920_at
zinc finger protein 266	ZNF266	14D	1.21139	2.66202e-06	Hs.656185	214686_at
zinc finger protein 3	ZNF3	14D	1.45657	0.00105175	Hs.435302	212684_at
zinc finger protein 36, C3H type-like 2	ZFP36L2	14D	1.27217	0.000413962	Hs.503093	201368_at
zinc finger, MYND domain containing 11	ZMYND11	14D	1.11799	6.83825e-05	Hs.292265	202136_at

[truncated: 20 more sheets: Ox. Stress, Redox, Metab, RNA Synth, Prot. Synth, DNA Synth, Prot. Degradation, CytoSkel, ECM, Chaperone, Golgi, Lyso, ER, BioSynth, Metalo., Channel, Transporters, Secr.Fact, Ves. Traff., Unkown]
