# Supplementary material for: Limb Immobilization Induces a Coordinate Down-Regulation of Mitochondrial and Other Metabolic Pathways in Men and Women
Source: PLoS One. 2009 Aug 5;4(8):e6518. doi: 10.1371/journal.pone.0006518 (PMC2716517; doi:10.1371/journal.pone.0006518)
Supplement: Table S2 — Genes altered by 48H but not following 14D of immobilization. (0.04 MB XLS) [file pone.0006518.s007.xls]

## Sheet: Sheet1
Genes altered by 48H but not following 14D of immobilization.
Gene.Title	Gene.Symbol	Ratio	TargetID	UniGene.ID
acetylcholinesterase (Yt blood group)	ACHE	0.436414	205378_s_at	Hs.154495
acetylcholinesterase (Yt blood group)	ACHE	0.459313	205377_s_at	Hs.154495
additional sex combs like 1 (Drosophila)	ASXL1	1.17104	212237_at	Hs.374043
ADP-ribosylation factor-like 1	ARL1	0.877784	201658_at	Hs.372616
alanyl-tRNA synthetase domain containing 1	AARSD1	0.818517	238740_at	Hs.317403
anaphase promoting complex subunit 1	ANAPC1	0.799776	218575_at	Hs.436527
angiomotin like 1	AMOTL1	0.816744	225450_at	Hs.503594
ankyrin repeat and SOCS box-containing 15	ASB15	0.738839	1564679_at	Hs.83916
ankyrin repeat domain 22	ANKRD22	2.06238	238439_at	Hs.217484
apolipoprotein B mRNA editing enzyme, catalytic polypeptide-like 2	APOBEC2	0.860478	206160_at	Hs.555915
aristaless related homeobox	ARX	0.752968	238878_at	Hs.300304
ASF1 anti-silencing function 1 homolog A (S. cerevisiae)	ASF1A	0.814489	203427_at	Hs.292316
asparaginyl-tRNA synthetase	NARS	0.906667	200027_at	Hs.465224
ataxin 1	ATXN1	1.23595	203232_s_at	Hs.434961
ataxin 1	ATXN1	1.23755	203231_s_at	Hs.434961
ATPase, Ca++ transporting, plasma membrane 2	ATP2B2	0.637478	216120_s_at	Hs.268942
B-cell CLL/lymphoma 2	BCL2	1.29724	203685_at	Hs.150749
cadherin, EGF LAG seven-pass G-type receptor 2 (flamingo homolog, Drosophila)	CELSR2	1.1463	204029_at	Hs.57652
cadherin, EGF LAG seven-pass G-type receptor 2 (flamingo homolog, Drosophila)	CELSR2	1.23128	36499_at	Hs.57652
calcium homeostasis endoplasmic reticulum protein	CHERP	1.23619	202230_s_at	Hs.631627
calcium homeostasis endoplasmic reticulum protein	CHERP	1.23619	202230_s_at	Hs.631627
calcium/calmodulin-dependent protein kinase (CaM kinase) II alpha	CAMK2A	0.723534	213108_at	Hs.143535
carbonic anhydrase IV	CA4	1.21584	206209_s_at	Hs.89485
casein kinase 2, alpha prime polypeptide	CSNK2A2	1.32022	203575_at	Hs.82201
CDNA clone IMAGE:5267251	---	0.602987	1568832_a_at	Hs.171092
CDNA clone IMAGE:6208446	---	0.748327	221844_x_at	Hs.555227
CDNA FLJ90128 fis, clone HEMBB1000276	---	1.4396	1556764_s_at	Hs.657837
chromosome 1 open reading frame 198	C1orf198	1.2152	223063_at	Hs.568242
chromosome 1 open reading frame 57	C1orf57	0.824971	226813_at	Hs.642715
chromosome 1 open reading frame 77	C1orf77	0.896328	202560_s_at	Hs.611057
Chromosome 10 open reading frame 30	C10orf30	1.20404	227341_at	Hs.498740
Chromosome 12 open reading frame 39	C12orf39	0.653453	229778_at	Hs.130692
chromosome 17 open reading frame 48	C17orf48	1.18234	223401_at	Hs.47668
chromosome 18 open reading frame 25	C18orf25	0.783731	226406_at	Hs.116486
chromosome 5 open reading frame 22	C5orf22	0.904928	203738_at	Hs.519246
chromosome 5 open reading frame 25	C5orf25	1.18491	228805_at	Hs.656602
chromosome 6 open reading frame 153	C6orf153	0.813801	225788_at	Hs.309231
cyclin D1	CCND1	0.546157	208711_s_at	Hs.523852
cytoplasmic polyadenylation element binding protein 3	CPEB3	1.2011	205773_at	Hs.131683
dehydrogenase/reductase (SDR family) member 7B	DHRS7B	0.802627	220690_s_at	Hs.386989
dual specificity phosphatase 10	DUSP10	0.684502	221563_at	Hs.497822
dual specificity phosphatase 10	DUSP10	0.709566	215501_s_at	Hs.497822
dynamin 1-like	DNM1L	0.737649	203105_s_at	Hs.556296
Dynamin 1-like	DNM1L	0.835041	226154_at	Hs.556296
endonuclease domain containing 1	ENDOD1	0.819399	212570_at	Hs.167115
endonuclease domain containing 1	ENDOD1	0.770402	212573_at	Hs.167115
eukaryotic translation elongation factor 1 epsilon 1	EEF1E1	0.841298	204905_s_at	Hs.631818
eukaryotic translation initiation factor 3, subunit 9 eta, 116kDa	EIF3S9	1.16875	208688_x_at	Hs.371001
eyes absent homolog 4 (Drosophila)	EYA4	1.21428	238877_at	Hs.661127
eyes absent homolog 4 (Drosophila)	EYA4	1.25728	207327_at	Hs.661127
family with sequence similarity 126, member A	FAM126A	1.33879	227239_at	Hs.85603
FLJ41603 protein	FLJ41603	1.33741	227717_at	Hs.256206
Full-length cDNA clone CS0DF038YD07 of Fetal brain of Homo sapiens (human)	---	1.24737	226974_at	Hs.594057
fuzzy homolog (Drosophila)	FUZ	0.680697	221187_s_at	Hs.288800
GABA(A) receptor-associated protein like 1	GABARAPL1	1.37803	208868_s_at	Hs.524250
glutamate decarboxylase-like 1	GADL1	0.360883	1563533_at	Hs.657052
glutamate receptor, ionotropic, N-methyl D-aspartate-like 1A /// GRINL1A combined protein /// similar to glutamate receptor, ionotropic, N-methyl D-aspartate-like 1A isoform 1	Gcom1 /// GRINL1A /// LOC339970	0.869178	212241_at	Hs.567849
glutathione S-transferase A4	GSTA4	0.8874	202967_at	Hs.485557
growth arrest-specific 6	GAS6	0.874542	1598_g_at	Hs.646346
HCV F-transactivated protein 1	LOC401152	0.873747	224602_at	Hs.173705
heat shock 70kDa protein 2	HSPA2	0.716937	211538_s_at	Hs.432648
heat shock 70kDa protein 5 (glucose-regulated protein, 78kDa)	HSPA5	0.885183	211936_at	Hs.605502
heat shock transcription factor 2	HSF2	1.27566	209657_s_at	Hs.158195
hect (homologous to the E6-AP (UBE3A) carboxyl terminus) domain and RCC1 (CHC1)-like domain (RLD) 1	HERC1	0.816778	218306_s_at	Hs.210385
hedgehog acyltransferase-like	HHATL	0.76665	223572_at	Hs.476041
heparan sulfate (glucosamine) 3-O-sulfotransferase 5	HS3ST5	0.629019	240479_at	Hs.645477
histone deacetylase 4	HDAC4	2.4399	204225_at	Hs.20516
histone deacetylase 4	HDAC4	2.54472	228813_at	Hs.20516
HLA-B associated transcript 5	BAT5	1.33437	224756_s_at	Hs.388188
HMG-box transcription factor 1	HBP1	1.33442	209102_s_at	Hs.162032
homolog of rat pragma of Rnd2	DKFZp761P0423	0.798288	235085_at	Hs.657673
hydroxyacylglutathione hydrolase-like	HAGHL	1.21093	223485_at	Hs.124015
hypothetical gene CG018	CG018	1.498	213375_s_at	Hs.161220
hypothetical protein FLJ10769	FLJ10769	1.17982	217940_s_at	Hs.408324
hypothetical protein LOC153346	LOC153346	0.698681	232181_at	Hs.483816
hypothetical protein LOC286071	LOC286071	0.78071	231032_at	Hs.410678
hypothetical protein LOC727916	LOC727916	0.457634	1559322_at	Hs.653101
IMP1 inner mitochondrial membrane peptidase-like (S. cerevisiae)	IMMP1L	0.8021	229025_s_at	Hs.502223
inhibitor of DNA binding 4, dominant negative helix-loop-helix protein	ID4	1.46961	209291_at	Hs.519601
integrin, beta 6	ITGB6	0.668084	208083_s_at	Hs.470399
interleukin-1 receptor-associated kinase 2	IRAK2	1.56357	231779_at	Hs.449207
Josephin domain containing 3	JOSD3	1.26671	221580_s_at	Hs.355750
kelch-like 21 (Drosophila)	KLHL21	1.46903	203068_at	Hs.7764
kelch-like 29 (Drosophila)	KLHL29	1.46523	229310_at	Hs.130593
kelch-like 31 (Drosophila)	KLHL31	0.752033	239398_at	Hs.131064
keratin associated protein 4-7	KRTAP4-7	0.825032	231808_at	Hs.380164
KIAA1377	KIAA1377	2.23426	236325_at	Hs.156352
KIAA1815	KIAA1815	0.803977	222603_at	Hs.591078
lactate dehydrogenase C	LDHC	0.472984	207022_s_at	Hs.654377
leucine rich repeat containing 39	LRRC39	0.720337	1559580_at	Hs.44277
leucine zipper, putative tumor suppressor 1	LZTS1	1.65726	219042_at	Hs.521432
MAX interactor 1	MXI1	1.26255	202364_at	---
membrane-associated ring finger (C3HC4) 8	2003-03-07	1.2164	221824_s_at	Hs.499489
metallothionein 1F	MT1F	1.51466	217165_x_at	---
metallothionein 1X	MT1X	1.41841	208581_x_at	Hs.374950
metallothionein 2A	MT2A	1.69188	212185_x_at	Hs.647371
methyltransferase like 7A	METTL7A	0.807668	207761_s_at	Hs.655369
microphthalmia-associated transcription factor	MITF	1.13955	207233_s_at	Hs.166017
microtubule-associated protein 1 light chain 3 beta	MAP1LC3B	1.15429	208786_s_at	Hs.356061
Mitogen-activated protein kinase kinase 3	MAP2K3	0.849716	215499_at	Hs.514012
modulator of apoptosis 1	MOAP1	1.19683	212508_at	Hs.24719
MRNA; cDNA DKFZp547I084 (from clone DKFZp547I084)	---	0.766599	232002_at	Hs.675397
multiple coagulation factor deficiency 2	MCFD2	1.18971	212245_at	Hs.293689
myeloid-associated differentiation marker	MYADM	0.752062	225673_at	Hs.380906
N-acetyltransferase 11	NAT11	0.79758	218734_at	Hs.523753
nephroblastoma overexpressed gene	NOV	0.415921	214321_at	Hs.235935
neuroblastoma RAS viral (v-ras) oncogene homolog	NRAS	0.808816	202647_s_at	Hs.486502
PAP associated domain containing 1	PAPD1	0.833393	218947_s_at	Hs.173946
peripheral myelin protein 22	PMP22	1.37174	210139_s_at	Hs.372031
PHD finger protein 1	PHF1	1.22734	40446_at	Hs.166204
phosphoglucomutase 5	PGM5	0.855336	226303_at	Hs.307835
polymerase (RNA) I polypeptide D, 16kDa	POLR1D	1.15533	218258_at	Hs.507584
potassium voltage-gated channel, shaker-related subfamily, member 7	KCNA7	0.524479	232936_at	Hs.306973
prenylcysteine oxidase 1	PCYOX1	0.702893	203803_at	Hs.591572
protein kinase C and casein kinase substrate in neurons 3	PACSIN3	0.758331	218744_s_at	Hs.334639
protein kinase, AMP-activated, beta 1 non-catalytic subunit	PRKAB1	1.52325	201834_at	Hs.6061
quiescin Q6 sulfhydryl oxidase 1	QSOX1	1.42387	201482_at	Hs.518374
RAB7A, member RAS oncogene family	RAB7A	0.877441	211961_s_at	Hs.15738
ras homolog gene family, member Q	RHOQ	0.86247	212117_at	Hs.643481
regulator of G-protein signalling 10	RGS10	2.26375	204319_s_at	Hs.501200
ribosomal protein L36a-like	RPL36AL	1.12781	207585_s_at	Hs.444749
ring finger and CHY zinc finger domain containing 1	RCHY1	0.829731	214281_s_at	Hs.48297
ring finger and CHY zinc finger domain containing 1	RCHY1	0.845493	212749_s_at	Hs.48297
sarcospan (Kras oncogene-associated gene)	SSPN	0.811715	204963_at	Hs.183428
sema domain, immunoglobulin domain (Ig), short basic domain, secreted, (semaphorin) 3C	SEMA3C	0.770527	203789_s_at	Hs.269109
sequestosome 1	SQSTM1	1.28427	201471_s_at	Hs.437277
serum/glucocorticoid regulated kinase	SGK	0.585413	201739_at	Hs.510078
SET and MYND domain containing 1	SMYD1	0.849523	228406_at	Hs.516176
SH3-domain binding protein 5 (BTK-associated)	SH3BP5	1.30341	201811_x_at	Hs.257761
similar to CG4502-PA	FLJ25076	1.32378	226618_at	Hs.126856
small nucleolar RNA host gene (non-protein coding) 7	SNHG7	1.352	229050_s_at	Hs.636619
snail homolog 3 (Drosophila)	SNAI3	0.484531	1560228_at	Hs.673548
splA/ryanodine receptor domain and SOCS box containing 3	SPSB3	1.19748	46256_at	Hs.592080
STT3, subunit of the oligosaccharyltransferase complex, homolog B (S. cerevisiae)	STT3B	0.839198	224700_at	Hs.475812
synaptogyrin 2	SYNGR2	1.22011	201079_at	Hs.464210
synaptojanin 2 binding protein	SYNJ2BP	0.821357	219156_at	Hs.443661
target of myb1 (chicken)	TOM1	1.31136	202807_s_at	Hs.474705
thioredoxin interacting protein	TXNIP	1.52804	201010_s_at	Hs.533977
thyroid hormone responsive (SPOT14 homolog, rat)	THRSP	1.825	229476_s_at	Hs.591969
transcriptional adaptor 2 (ADA2 homolog, yeast)-beta	MGC21874	1.18689	226240_at	Hs.518614
transmembrane protein 182	TMEM182	0.837134	238867_at	Hs.436203
tripartite motif-containing 28	TRIM28	1.18827	200990_at	Hs.467408
tRNA splicing endonuclease 34 homolog (S. cerevisiae)	TSEN34	1.19647	218132_s_at	Hs.15580
trypsin domain containing 1	TYSND1	1.48454	225877_at	Hs.533655
TSC22 domain family, member 3	TSC22D3	1.26668	208763_s_at	Hs.522074
TSC22 domain family, member 3	TSC22D3	1.36805	207001_x_at	Hs.522074
tumor necrosis factor superfamily, member 5-induced protein 1	TNFSF5IP1	1.15787	218467_at	Hs.464652
tumor protein p53 (Li-Fraumeni syndrome)	TP53	1.97384	211300_s_at	Hs.654481
ubiquitin specific peptidase 10	USP10	0.824559	209137_s_at	Hs.136778
ubiquitin specific peptidase 14 (tRNA-guanine transglycosylase)	USP14	1.08694	226567_at	Hs.464416
uncoupling protein 3 (mitochondrial, proton carrier)	UCP3	1.53071	207349_s_at	Hs.101337
UPF1 regulator of nonsense transcripts homolog (yeast)	UPF1	1.28028	211168_s_at	Hs.515266
zinc finger CCCH-type containing 12C	ZC3H12C	1.38137	231899_at	Hs.376289
zinc finger DAZ interacting protein 3	DZIP3	0.495521	207232_s_at	Hs.409210
zinc finger DAZ interacting protein 3	DZIP3	0.832045	213186_at	Hs.409210
